# Supplementary material
Source: Preprints.org preprint supplement (doi:10.20944/preprints202104.0604.v1)
Supplement: Supplementary file 1 [file supplementary]

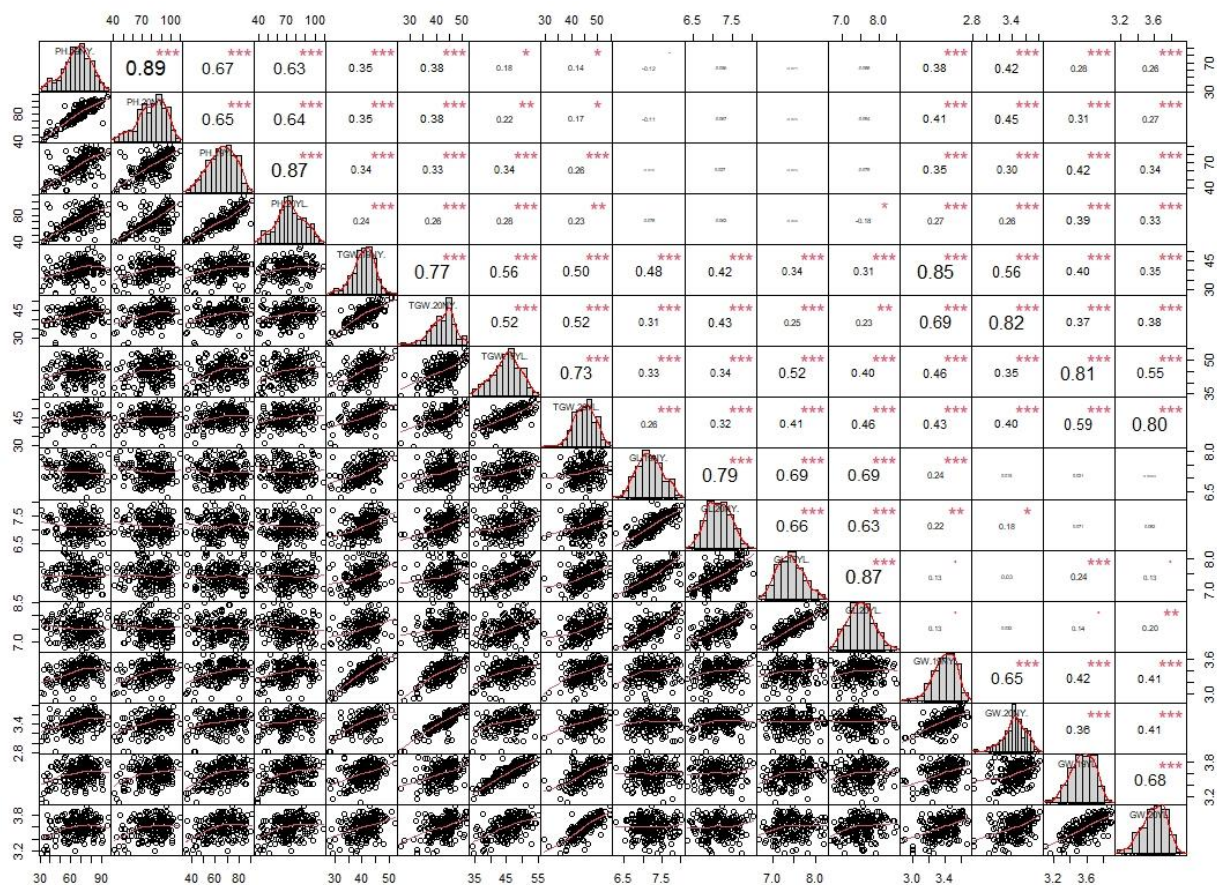

**Supplementary Figure 2 Correlation among plant height, TGW, grain length and grain width in different environments.**

**Note:** Horizontally and vertically, each four represents a phenotype, and each small cell represents a different environment.
