# Supplementary material
Source: Preprints.org preprint supplement (doi:10.20944/preprints202104.0604.v1)
Supplement: Supplementary file 1 [file Supplementary Table 1 Functional markers of plant height and 1000 grain weight.xlsx]

## Sheet: fuctional makers
	Functional markers of plant height and 1000 grain weight
	Gene name	SNP name	Chr	Reference	Allele	SNP1	Allele1	Phenotype1	SNP2	Allele1	Phenotype2
	Rht-B1_SNP	AX-86170699	4B	T	C	C	Rht-B1a	Wild type	T	Rht-B1b	Dwarf
	Rht-D1_SNP	AX-86170701	4D	T	G	G	Rht-D1a	Wild type	T	Rht-D1b	Dwarf
	Rht-B1_197IND	AX-179477460	4B	-	TTGATCATCGGAATGAATAT	Ins	Rht-B1a+197 bp	Reduced height	Del	Rht-B1a	Wild type
	Rht-B1_160IND	AX-179477461	4B	-	ACTCGAAAGTGCTCTTTGTA	Ins	Rht-B1a+160 bp	Reduced height	Del	Rht-B1a	Wild type
	Rht-B1_SNP	AX-176638966	4B	T	C	C	Rht-B1a	Wild type	T	Rht-B1b	Dwarf
	Rht-D1_SNP	AX-86170702	4D	T	G	G	Rht-D1a	Wild type	T	Rht-D1b	Dwarf
	TaSus1-7A	AX-110471140	7A	A	T	T	TaTGW-7Aa	High TGW	A	TaTGW-7Ab	Lower TGW
	TaSus1-7B	AX-179477464	7B	-	TGGTGTG	Ins	Hap-T	Higher TGW	Del	Hap-C	Lower TGW
	TaGW2-6B	AX-176642322	6B	A	C	A	Hap-1	Higher TGW	C	Hap2, 3, 4	Lower TGW
		AX-176641771	6B	T	C	C	Hap1,2	Higher TGW	T	Hap3,4	Lower TGW
		AX-176641676	6B	A	G	G	Hap1, 2, 3	Higher TGW	A	Hap-4	Lowest TGW
	TaSus2-2B	AX-94980963	2B	T	C	T	Hap-L	Lower TGW	C	Hap-H	Higher TGW
	TaSus2-2A	AX-176643663	2A	A	C	G	Hap-G	Lower TGW	A	Hap-A	Higher TGW
	TaGS-D1	AX-176640664	7D	T	G	G	TaGS-D1a	Higher TGW	T	TaGD-D1b	Lower TGW
	TaGS2A	AX-179477467	2A	-	TCCCTCCGTTGAGGGAGTAC	Ins	TaGS2-A1b	High TGW	Del	Low TGW	TaGS2-A1a
	TaGS6D	AX-179477468	6D	-	CTA	Ins	Hap-I	Low TGW	Del	Hap-II	High TGW
	TaCwi-A1	AX-86170752	2A	T	G	C	TaCwi-A1b	low TGW	A	TaCwi-A1a	hight TGW
	TaGASR	AX-179477459	7A	-	GTGCCGTGCCAGCCGGTTCC	Ins	H1g	Low TGW	Del	H1c	High TGW
		AX-181481120	7A	-	GTGCCGTGCCAGCCGGTTCC	Ins	H1g	Low TGW	Del	H1c	High TGW
	TaCKX-D1	AX-179477458	3D	-	ATGCATATGCATATGCAT	Ins	TaCKX-D1b	Low TGW	Del	TaCKX-D1a	High TGW

## Sheet: fuctional makes type
Gene name	SNP name	SD-001	SD-002	SD-003	SD-004	SD-005	SD-006	SD-007	SD-008	SD-009	SD-010	SD-011	SD-012	SD-013	SD-014	SD-015	SD-016	SD-017	SD-018	SD-019	SD-020	SD-021	SD-022	SD-023	SD-024	SD-025	SD-026	SD-027	SD-028	SD-029	SD-030	SD-031	SD-032	SD-033	SD-034	SD-035	SD-036	SD-037	SD-038	SD-039	SD-040	SD-041	SD-042	SD-043	SD-044	SD-045	SD-046	SD-047	SD-048
Rht-B1_SNP	AX-86170699	C/C	C/C	C/C	C/C	C/C	C/C	C/C	C/C	C/C	C/C	C/C	C/C	C/C	C/C	C/C	C/C	C/C	C/C	C/C	C/C	C/C	C/C	C/C	C/C	C/C	C/C	C/C	C/C	C/C	C/C	C/C	C/C	C/C	C/C	C/C	C/C	C/C	C/C	C/C	C/C	C/C	C/C	C/C	C/C	C/C	C/C	C/C	C/C
Rht-D1_SNP	AX-86170701	G/G	T/T	G/G	T/T	G/G	T/T	G/G	T/T	G/G	G/G	T/T	G/G	T/T	T/T	G/G	G/G	T/T	T/T	G/G	T/T	T/T	G/G	T/T	T/T	T/T	G/G	G/G	G/G	G/G	T/T	T/T	T/T	G/G	T/T	G/G	G/G	G/G	G/G	T/T	T/T	T/T	G/G	G/G	G/G	---	G/G	---	G/G
Rht-B1_197IND	AX-179477460	-/-	TTGATCATCGGAATGAATAT/TTGATCATCGGAATGAATAT	TTGATCATCGGAATGAATAT/TTGATCATCGGAATGAATAT	TTGATCATCGGAATGAATAT/TTGATCATCGGAATGAATAT	-/-	TTGATCATCGGAATGAATAT/TTGATCATCGGAATGAATAT	TTGATCATCGGAATGAATAT/TTGATCATCGGAATGAATAT	-/-	-/-	TTGATCATCGGAATGAATAT/TTGATCATCGGAATGAATAT	TTGATCATCGGAATGAATAT/TTGATCATCGGAATGAATAT	-/-	TTGATCATCGGAATGAATAT/TTGATCATCGGAATGAATAT	TTGATCATCGGAATGAATAT/TTGATCATCGGAATGAATAT	TTGATCATCGGAATGAATAT/TTGATCATCGGAATGAATAT	TTGATCATCGGAATGAATAT/TTGATCATCGGAATGAATAT	-/-	-/-	TTGATCATCGGAATGAATAT/TTGATCATCGGAATGAATAT	TTGATCATCGGAATGAATAT/TTGATCATCGGAATGAATAT	-/-	TTGATCATCGGAATGAATAT/TTGATCATCGGAATGAATAT	-/TTGATCATCGGAATGAATAT	TTGATCATCGGAATGAATAT/TTGATCATCGGAATGAATAT	-/-	TTGATCATCGGAATGAATAT/TTGATCATCGGAATGAATAT	TTGATCATCGGAATGAATAT/TTGATCATCGGAATGAATAT	-/-	-/-	TTGATCATCGGAATGAATAT/TTGATCATCGGAATGAATAT	-/TTGATCATCGGAATGAATAT	TTGATCATCGGAATGAATAT/TTGATCATCGGAATGAATAT	-/-	TTGATCATCGGAATGAATAT/TTGATCATCGGAATGAATAT	-/-	-/-	-/-	TTGATCATCGGAATGAATAT/TTGATCATCGGAATGAATAT	TTGATCATCGGAATGAATAT/TTGATCATCGGAATGAATAT	-/-	TTGATCATCGGAATGAATAT/TTGATCATCGGAATGAATAT	-/-	-/-	TTGATCATCGGAATGAATAT/TTGATCATCGGAATGAATAT	TTGATCATCGGAATGAATAT/TTGATCATCGGAATGAATAT	-/-	-/-	TTGATCATCGGAATGAATAT/TTGATCATCGGAATGAATAT
Rht-B1_160IND	AX-179477461	-/-	-/-	-/-	-/-	-/-	-/-	-/-	-/-	-/-	-/-	-/-	-/-	-/-	-/-	-/-	-/-	-/-	-/-	-/-	-/-	-/-	-/-	-/-	-/-	-/-	-/-	-/-	-/-	-/-	-/-	-/-	-/-	-/-	-/-	-/-	-/-	-/-	-/-	-/-	-/-	-/-	-/-	-/-	-/-	-/-	-/-	-/-	-/-
Rht-B1_SNP	AX-176638966	C/C	C/C	C/C	C/C	C/C	C/C	C/C	C/C	C/C	C/C	C/C	C/C	C/C	C/C	C/C	C/C	C/C	C/C	C/C	C/C	C/C	C/C	---	C/C	C/C	C/C	C/C	C/C	C/C	C/C	C/C	C/C	C/C	C/C	C/C	C/C	C/C	C/C	C/C	C/C	C/C	C/C	C/C	C/C	C/C	C/C	C/C	C/C
Rht-D1_SNP	AX-86170702	G/G	G/G	G/G	G/G	G/G	G/G	G/G	G/G	G/G	G/G	G/G	G/G	G/G	G/G	G/G	G/G	G/G	G/G	G/G	G/G	G/G	G/G	G/G	G/G	G/G	G/G	G/G	G/G	G/G	G/G	G/G	G/G	G/G	G/G	G/G	G/G	G/G	G/G	G/G	G/G	G/G	G/G	G/G	G/G	G/G	G/G	G/G	G/G
TaSus1-7A	AX-110471140	T/T	T/T	T/T	T/T	T/T	T/T	T/T	T/T	T/T	T/T	T/T	T/T	T/T	T/T	T/T	T/T	T/T	T/T	T/T	T/T	T/T	T/T	T/T	T/T	T/T	T/T	T/T	T/T	T/T	T/T	T/T	T/T	T/T	T/T	T/T	T/T	T/T	T/T	T/T	T/T	T/T	T/T	T/T	T/T	T/T	T/T	T/T	T/T
TaSus1-7B	AX-179477464	TGGTGTG/TGGTGTG	TGGTGTG/TGGTGTG	TGGTGTG/TGGTGTG	TGGTGTG/TGGTGTG	TGGTGTG/TGGTGTG	TGGTGTG/TGGTGTG	TGGTGTG/TGGTGTG	TGGTGTG/TGGTGTG	TGGTGTG/TGGTGTG	TGGTGTG/TGGTGTG	TGGTGTG/TGGTGTG	TGGTGTG/TGGTGTG	TGGTGTG/TGGTGTG	TGGTGTG/TGGTGTG	TGGTGTG/TGGTGTG	TGGTGTG/TGGTGTG	TGGTGTG/TGGTGTG	TGGTGTG/TGGTGTG	TGGTGTG/TGGTGTG	TGGTGTG/TGGTGTG	TGGTGTG/TGGTGTG	TGGTGTG/TGGTGTG	TGGTGTG/TGGTGTG	TGGTGTG/TGGTGTG	TGGTGTG/TGGTGTG	TGGTGTG/TGGTGTG	TGGTGTG/TGGTGTG	TGGTGTG/TGGTGTG	TGGTGTG/TGGTGTG	TGGTGTG/TGGTGTG	TGGTGTG/TGGTGTG	TGGTGTG/TGGTGTG	TGGTGTG/TGGTGTG	TGGTGTG/TGGTGTG	TGGTGTG/TGGTGTG	TGGTGTG/TGGTGTG	TGGTGTG/TGGTGTG	TGGTGTG/TGGTGTG	TGGTGTG/TGGTGTG	TGGTGTG/TGGTGTG	TGGTGTG/TGGTGTG	TGGTGTG/TGGTGTG	TGGTGTG/TGGTGTG	TGGTGTG/TGGTGTG	TGGTGTG/TGGTGTG	TGGTGTG/TGGTGTG	TGGTGTG/TGGTGTG	TGGTGTG/TGGTGTG
TaGW2-6B	AX-176642322	C/C	C/C	C/C	C/C	C/C	C/C	C/C	C/C	C/C	C/C	C/C	C/C	C/C	C/C	C/C	C/C	C/C	C/C	C/C	C/C	A/A	C/C	C/C	C/C	C/C	C/C	C/C	A/A	C/C	C/C	C/C	C/C	C/C	C/C	C/C	C/C	C/C	C/C	C/C	C/C	C/C	C/C	C/C	C/C	C/C	C/C	C/C	C/C
	AX-176641771	C/C	C/C	C/C	C/C	C/C	C/C	C/C	C/C	C/C	C/C	C/C	C/C	C/C	C/C	C/C	C/C	C/C	C/C	C/C	C/C	C/C	C/C	C/C	C/C	C/C	C/C	C/C	C/C	C/C	C/C	C/C	C/C	C/C	C/C	C/C	C/C	C/C	C/C	C/C	C/C	C/C	C/C	C/C	C/C	C/C	C/C	C/C	C/C
	AX-176641676	G/G	G/G	G/G	G/G	G/G	G/G	G/G	G/G	G/G	G/G	G/G	G/G	G/G	G/G	G/G	G/G	G/G	G/G	G/G	G/G	G/G	G/G	G/G	G/G	G/G	G/G	G/G	G/G	G/G	G/G	G/G	G/G	G/G	G/G	G/G	G/G	G/G	G/G	G/G	G/G	G/G	G/G	G/G	G/G	G/G	G/G	G/G	G/G
TaSus2-2B	AX-94980963	C/C	C/C	C/C	C/C	C/C	C/C	C/C	C/C	C/C	C/C	C/C	C/C	C/C	C/C	C/C	C/C	C/C	C/C	C/C	C/C	C/C	C/C	C/C	C/C	C/C	C/C	C/C	C/C	C/C	C/C	C/C	---	C/C	C/C	C/C	C/C	C/C	C/C	C/C	C/C	C/C	C/C	C/C	C/C	C/C	C/C	C/C	C/C
TaSus2-2A	AX-176643663	A/A	A/A	A/A	A/A	A/A	A/A	A/A	A/A	A/A	A/A	A/A	A/A	A/A	A/A	A/A	A/A	A/A	A/A	A/A	A/A	A/A	A/A	A/A	A/A	A/A	A/A	A/A	A/A	A/A	A/A	A/A	A/A	A/A	A/A	A/A	A/A	A/A	A/A	A/A	A/A	A/A	A/A	A/A	A/A	A/A	A/A	A/A	A/A
TaGS-D1	AX-176640664	G/G	G/G	G/G	G/G	G/G	G/G	T/G	---	G/G	G/G	G/G	G/G	G/G	G/G	G/G	G/G	G/G	G/G	G/G	G/G	T/T	G/G	G/G	G/G	G/G	G/G	G/G	G/G	G/G	G/G	G/G	G/G	G/G	G/G	G/G	G/G	G/G	G/G	G/G	G/G	G/G	G/G	G/G	G/G	G/G	G/G	G/G	G/G
TaGS2A	AX-179477467	TCCCTCCGTTGAGGGAGTAC/TCCCTCCGTTGAGGGAGTAC	TCCCTCCGTTGAGGGAGTAC/TCCCTCCGTTGAGGGAGTAC	TCCCTCCGTTGAGGGAGTAC/TCCCTCCGTTGAGGGAGTAC	TCCCTCCGTTGAGGGAGTAC/TCCCTCCGTTGAGGGAGTAC	TCCCTCCGTTGAGGGAGTAC/TCCCTCCGTTGAGGGAGTAC	TCCCTCCGTTGAGGGAGTAC/TCCCTCCGTTGAGGGAGTAC	TCCCTCCGTTGAGGGAGTAC/TCCCTCCGTTGAGGGAGTAC	TCCCTCCGTTGAGGGAGTAC/TCCCTCCGTTGAGGGAGTAC	TCCCTCCGTTGAGGGAGTAC/TCCCTCCGTTGAGGGAGTAC	TCCCTCCGTTGAGGGAGTAC/TCCCTCCGTTGAGGGAGTAC	TCCCTCCGTTGAGGGAGTAC/TCCCTCCGTTGAGGGAGTAC	TCCCTCCGTTGAGGGAGTAC/TCCCTCCGTTGAGGGAGTAC	TCCCTCCGTTGAGGGAGTAC/TCCCTCCGTTGAGGGAGTAC	TCCCTCCGTTGAGGGAGTAC/TCCCTCCGTTGAGGGAGTAC	TCCCTCCGTTGAGGGAGTAC/TCCCTCCGTTGAGGGAGTAC	TCCCTCCGTTGAGGGAGTAC/TCCCTCCGTTGAGGGAGTAC	TCCCTCCGTTGAGGGAGTAC/TCCCTCCGTTGAGGGAGTAC	TCCCTCCGTTGAGGGAGTAC/TCCCTCCGTTGAGGGAGTAC	TCCCTCCGTTGAGGGAGTAC/TCCCTCCGTTGAGGGAGTAC	TCCCTCCGTTGAGGGAGTAC/TCCCTCCGTTGAGGGAGTAC	TCCCTCCGTTGAGGGAGTAC/TCCCTCCGTTGAGGGAGTAC	TCCCTCCGTTGAGGGAGTAC/TCCCTCCGTTGAGGGAGTAC	TCCCTCCGTTGAGGGAGTAC/TCCCTCCGTTGAGGGAGTAC	TCCCTCCGTTGAGGGAGTAC/TCCCTCCGTTGAGGGAGTAC	TCCCTCCGTTGAGGGAGTAC/TCCCTCCGTTGAGGGAGTAC	TCCCTCCGTTGAGGGAGTAC/TCCCTCCGTTGAGGGAGTAC	TCCCTCCGTTGAGGGAGTAC/TCCCTCCGTTGAGGGAGTAC	TCCCTCCGTTGAGGGAGTAC/TCCCTCCGTTGAGGGAGTAC	TCCCTCCGTTGAGGGAGTAC/TCCCTCCGTTGAGGGAGTAC	TCCCTCCGTTGAGGGAGTAC/TCCCTCCGTTGAGGGAGTAC	TCCCTCCGTTGAGGGAGTAC/TCCCTCCGTTGAGGGAGTAC	TCCCTCCGTTGAGGGAGTAC/TCCCTCCGTTGAGGGAGTAC	TCCCTCCGTTGAGGGAGTAC/TCCCTCCGTTGAGGGAGTAC	TCCCTCCGTTGAGGGAGTAC/TCCCTCCGTTGAGGGAGTAC	TCCCTCCGTTGAGGGAGTAC/TCCCTCCGTTGAGGGAGTAC	TCCCTCCGTTGAGGGAGTAC/TCCCTCCGTTGAGGGAGTAC	TCCCTCCGTTGAGGGAGTAC/TCCCTCCGTTGAGGGAGTAC	TCCCTCCGTTGAGGGAGTAC/TCCCTCCGTTGAGGGAGTAC	TCCCTCCGTTGAGGGAGTAC/TCCCTCCGTTGAGGGAGTAC	TCCCTCCGTTGAGGGAGTAC/TCCCTCCGTTGAGGGAGTAC	TCCCTCCGTTGAGGGAGTAC/TCCCTCCGTTGAGGGAGTAC	TCCCTCCGTTGAGGGAGTAC/TCCCTCCGTTGAGGGAGTAC	TCCCTCCGTTGAGGGAGTAC/TCCCTCCGTTGAGGGAGTAC	---	TCCCTCCGTTGAGGGAGTAC/TCCCTCCGTTGAGGGAGTAC	TCCCTCCGTTGAGGGAGTAC/TCCCTCCGTTGAGGGAGTAC	TCCCTCCGTTGAGGGAGTAC/TCCCTCCGTTGAGGGAGTAC	TCCCTCCGTTGAGGGAGTAC/TCCCTCCGTTGAGGGAGTAC
TaGS6D	AX-179477468	-/-	-/-	-/-	-/-	-/-	-/-	-/-	-/-	-/-	-/-	-/-	-/-	-/-	-/-	-/-	-/-	-/-	-/-	-/-	-/-	-/-	-/-	-/-	-/-	-/-	-/-	-/-	-/-	-/-	-/-	-/-	-/-	-/-	-/-	-/-	-/-	-/-	-/-	-/-	-/-	-/-	-/-	-/-	-/-	-/CTA	-/-	-/-	-/-
TaCwi-A1	AX-86170752	G/G	G/G	G/G	G/G	G/G	G/G	G/G	G/G	G/G	G/G	G/G	G/G	G/G	G/G	G/G	G/G	G/G	G/G	G/G	G/G	G/G	G/G	G/G	G/G	G/G	G/G	G/G	G/G	G/G	G/G	G/G	G/G	G/G	G/G	G/G	G/G	G/G	G/G	G/G	G/G	G/G	G/G	G/G	G/G	G/G	G/G	G/G	G/G
TaGASR	AX-179477459	GTGCCGTGCCAGCCGGTTCC/GTGCCGTGCCAGCCGGTTCC	GTGCCGTGCCAGCCGGTTCC/GTGCCGTGCCAGCCGGTTCC	GTGCCGTGCCAGCCGGTTCC/GTGCCGTGCCAGCCGGTTCC	GTGCCGTGCCAGCCGGTTCC/GTGCCGTGCCAGCCGGTTCC	GTGCCGTGCCAGCCGGTTCC/GTGCCGTGCCAGCCGGTTCC	GTGCCGTGCCAGCCGGTTCC/GTGCCGTGCCAGCCGGTTCC	GTGCCGTGCCAGCCGGTTCC/GTGCCGTGCCAGCCGGTTCC	GTGCCGTGCCAGCCGGTTCC/GTGCCGTGCCAGCCGGTTCC	GTGCCGTGCCAGCCGGTTCC/GTGCCGTGCCAGCCGGTTCC	GTGCCGTGCCAGCCGGTTCC/GTGCCGTGCCAGCCGGTTCC	GTGCCGTGCCAGCCGGTTCC/GTGCCGTGCCAGCCGGTTCC	GTGCCGTGCCAGCCGGTTCC/GTGCCGTGCCAGCCGGTTCC	GTGCCGTGCCAGCCGGTTCC/GTGCCGTGCCAGCCGGTTCC	GTGCCGTGCCAGCCGGTTCC/GTGCCGTGCCAGCCGGTTCC	GTGCCGTGCCAGCCGGTTCC/GTGCCGTGCCAGCCGGTTCC	GTGCCGTGCCAGCCGGTTCC/GTGCCGTGCCAGCCGGTTCC	GTGCCGTGCCAGCCGGTTCC/GTGCCGTGCCAGCCGGTTCC	GTGCCGTGCCAGCCGGTTCC/GTGCCGTGCCAGCCGGTTCC	GTGCCGTGCCAGCCGGTTCC/GTGCCGTGCCAGCCGGTTCC	GTGCCGTGCCAGCCGGTTCC/GTGCCGTGCCAGCCGGTTCC	GTGCCGTGCCAGCCGGTTCC/GTGCCGTGCCAGCCGGTTCC	GTGCCGTGCCAGCCGGTTCC/GTGCCGTGCCAGCCGGTTCC	GTGCCGTGCCAGCCGGTTCC/GTGCCGTGCCAGCCGGTTCC	GTGCCGTGCCAGCCGGTTCC/GTGCCGTGCCAGCCGGTTCC	GTGCCGTGCCAGCCGGTTCC/GTGCCGTGCCAGCCGGTTCC	GTGCCGTGCCAGCCGGTTCC/GTGCCGTGCCAGCCGGTTCC	GTGCCGTGCCAGCCGGTTCC/GTGCCGTGCCAGCCGGTTCC	GTGCCGTGCCAGCCGGTTCC/GTGCCGTGCCAGCCGGTTCC	GTGCCGTGCCAGCCGGTTCC/GTGCCGTGCCAGCCGGTTCC	GTGCCGTGCCAGCCGGTTCC/GTGCCGTGCCAGCCGGTTCC	GTGCCGTGCCAGCCGGTTCC/GTGCCGTGCCAGCCGGTTCC	GTGCCGTGCCAGCCGGTTCC/GTGCCGTGCCAGCCGGTTCC	GTGCCGTGCCAGCCGGTTCC/GTGCCGTGCCAGCCGGTTCC	GTGCCGTGCCAGCCGGTTCC/GTGCCGTGCCAGCCGGTTCC	GTGCCGTGCCAGCCGGTTCC/GTGCCGTGCCAGCCGGTTCC	GTGCCGTGCCAGCCGGTTCC/GTGCCGTGCCAGCCGGTTCC	GTGCCGTGCCAGCCGGTTCC/GTGCCGTGCCAGCCGGTTCC	GTGCCGTGCCAGCCGGTTCC/GTGCCGTGCCAGCCGGTTCC	GTGCCGTGCCAGCCGGTTCC/GTGCCGTGCCAGCCGGTTCC	GTGCCGTGCCAGCCGGTTCC/GTGCCGTGCCAGCCGGTTCC	GTGCCGTGCCAGCCGGTTCC/GTGCCGTGCCAGCCGGTTCC	GTGCCGTGCCAGCCGGTTCC/GTGCCGTGCCAGCCGGTTCC	GTGCCGTGCCAGCCGGTTCC/GTGCCGTGCCAGCCGGTTCC	GTGCCGTGCCAGCCGGTTCC/GTGCCGTGCCAGCCGGTTCC	GTGCCGTGCCAGCCGGTTCC/GTGCCGTGCCAGCCGGTTCC	GTGCCGTGCCAGCCGGTTCC/GTGCCGTGCCAGCCGGTTCC	GTGCCGTGCCAGCCGGTTCC/GTGCCGTGCCAGCCGGTTCC	GTGCCGTGCCAGCCGGTTCC/GTGCCGTGCCAGCCGGTTCC
	AX-181481120	-/-	-/-	-/-	-/-	-/-	-/-	-/-	-/-	-/-	-/-	-/-	-/-	-/-	-/-	-/-	-/-	-/-	-/-	-/-	-/-	-/-	-/-	-/-	-/-	-/-	-/-	-/-	-/-	-/-	-/-	-/-	-/-	-/-	-/-	-/-	-/-	-/-	-/-	-/-	-/-	-/-	-/-	-/-	-/-	-/-	-/-	-/-	-/-
TaCKX-D1	AX-179477458	ATGCATATGCATATGCAT/ATGCATATGCATATGCAT	ATGCATATGCATATGCAT/ATGCATATGCATATGCAT	ATGCATATGCATATGCAT/ATGCATATGCATATGCAT	ATGCATATGCATATGCAT/ATGCATATGCATATGCAT	ATGCATATGCATATGCAT/ATGCATATGCATATGCAT	ATGCATATGCATATGCAT/ATGCATATGCATATGCAT	ATGCATATGCATATGCAT/ATGCATATGCATATGCAT	ATGCATATGCATATGCAT/ATGCATATGCATATGCAT	ATGCATATGCATATGCAT/ATGCATATGCATATGCAT	ATGCATATGCATATGCAT/ATGCATATGCATATGCAT	ATGCATATGCATATGCAT/ATGCATATGCATATGCAT	ATGCATATGCATATGCAT/ATGCATATGCATATGCAT	ATGCATATGCATATGCAT/ATGCATATGCATATGCAT	ATGCATATGCATATGCAT/ATGCATATGCATATGCAT	ATGCATATGCATATGCAT/ATGCATATGCATATGCAT	ATGCATATGCATATGCAT/ATGCATATGCATATGCAT	ATGCATATGCATATGCAT/ATGCATATGCATATGCAT	ATGCATATGCATATGCAT/ATGCATATGCATATGCAT	ATGCATATGCATATGCAT/ATGCATATGCATATGCAT	ATGCATATGCATATGCAT/ATGCATATGCATATGCAT	ATGCATATGCATATGCAT/ATGCATATGCATATGCAT	ATGCATATGCATATGCAT/ATGCATATGCATATGCAT	ATGCATATGCATATGCAT/ATGCATATGCATATGCAT	ATGCATATGCATATGCAT/ATGCATATGCATATGCAT	ATGCATATGCATATGCAT/ATGCATATGCATATGCAT	ATGCATATGCATATGCAT/ATGCATATGCATATGCAT	ATGCATATGCATATGCAT/ATGCATATGCATATGCAT	ATGCATATGCATATGCAT/ATGCATATGCATATGCAT	ATGCATATGCATATGCAT/ATGCATATGCATATGCAT	ATGCATATGCATATGCAT/ATGCATATGCATATGCAT	ATGCATATGCATATGCAT/ATGCATATGCATATGCAT	ATGCATATGCATATGCAT/ATGCATATGCATATGCAT	ATGCATATGCATATGCAT/ATGCATATGCATATGCAT	ATGCATATGCATATGCAT/ATGCATATGCATATGCAT	ATGCATATGCATATGCAT/ATGCATATGCATATGCAT	ATGCATATGCATATGCAT/ATGCATATGCATATGCAT	ATGCATATGCATATGCAT/ATGCATATGCATATGCAT	ATGCATATGCATATGCAT/ATGCATATGCATATGCAT	ATGCATATGCATATGCAT/ATGCATATGCATATGCAT	ATGCATATGCATATGCAT/ATGCATATGCATATGCAT	ATGCATATGCATATGCAT/ATGCATATGCATATGCAT	ATGCATATGCATATGCAT/ATGCATATGCATATGCAT	ATGCATATGCATATGCAT/ATGCATATGCATATGCAT	ATGCATATGCATATGCAT/ATGCATATGCATATGCAT	ATGCATATGCATATGCAT/ATGCATATGCATATGCAT	ATGCATATGCATATGCAT/ATGCATATGCATATGCAT	ATGCATATGCATATGCAT/ATGCATATGCATATGCAT	ATGCATATGCATATGCAT/ATGCATATGCATATGCAT
[truncated: 152 more columns]
