# Supplementary material
Source: Preprints.org preprint supplement (doi:10.20944/preprints202104.0604.v1)
Supplement: Supplementary file 2 [file supplementary]

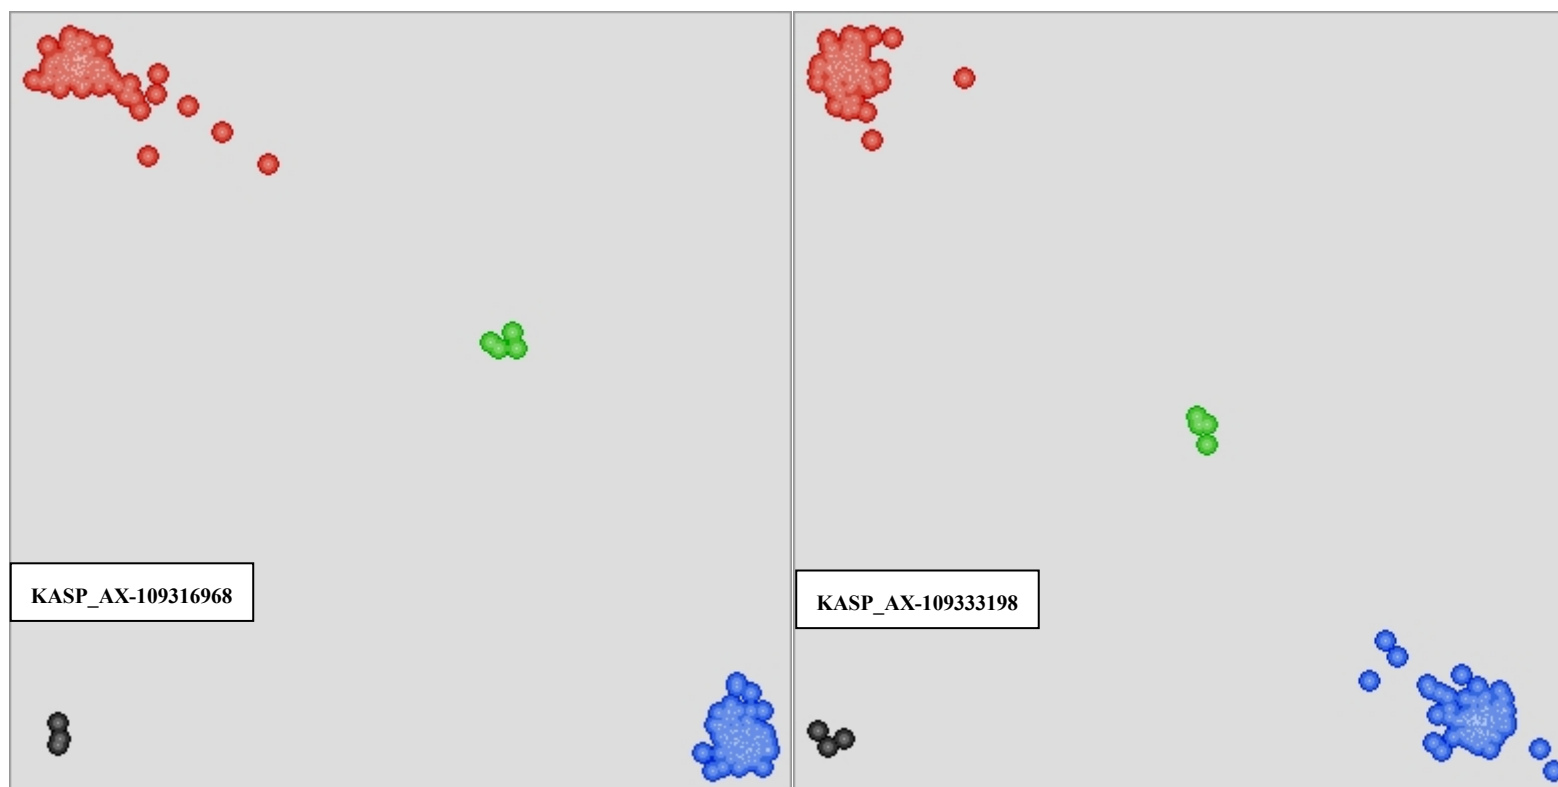

Supplementary Figure 5 KASP\_AX-109316968 and KASP\_AX-109333198 markers genotyping results.

Note:KASP\_AX-109316968, blue represents the allele of Xinong1376, red represents the allele of Xiaoyan81, and green represents the heterozygous genotype.

Note:KASP\_AX-109333198, blue represents the allele of Xiaoyan81, red represents the allele of Xinong1376, and green represents the heterozygous genotype.
