# Supplementary material
Source: Preprints.org preprint supplement (doi:10.20944/preprints202104.0604.v1)
Supplement: Supplementary file 3 [file supplementary]

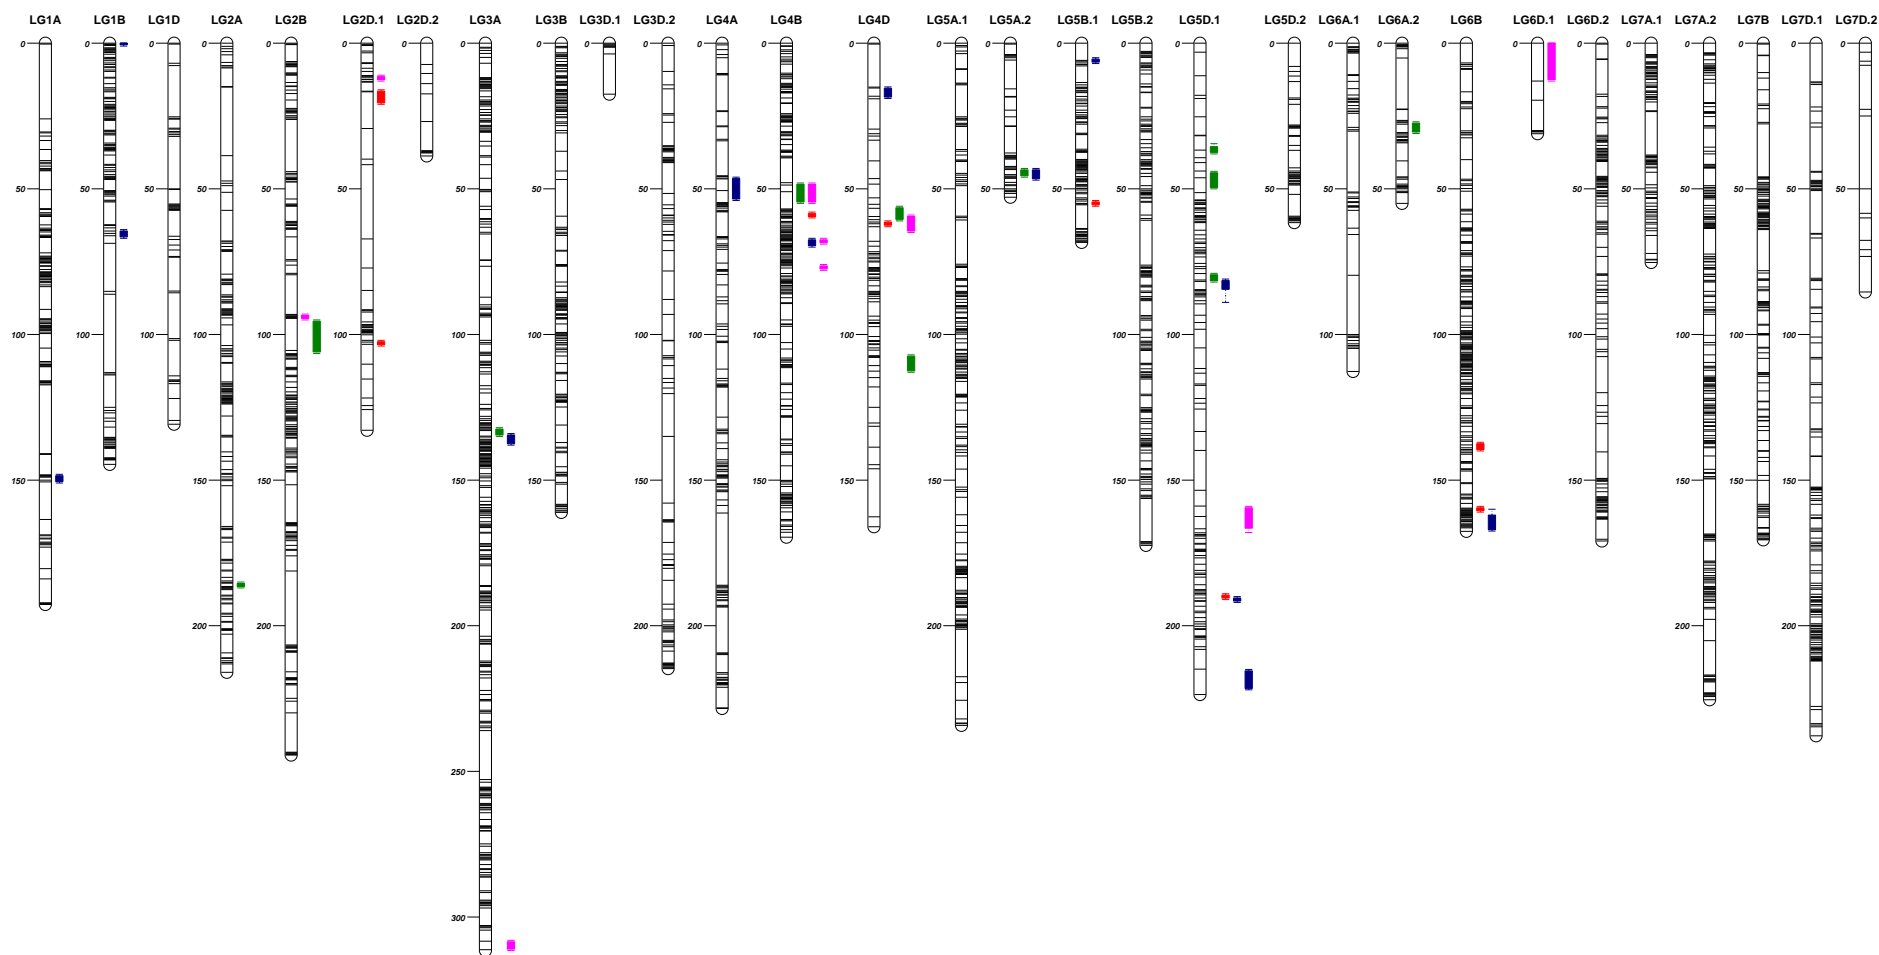

**Supplementary Figure 4 QTL mapping of plant height and TGW phenotypes at genome-wide level. The right block of the genetic map is the QTL site, and red is regarded as the QTL site of plant height, green as the QTL site of 1000-grain weight, blue as the QTL site of grain length, and pink as the QTL site of grain width.**
