# Supplementary material
Source: Preprints.org preprint supplement (doi:10.20944/preprints202104.0604.v1)
Supplement: Supplementary file 3 [file Supplementary Table 2.xlsx]

## Sheet: Sheet1
ID	Gene type	Env	PH	TGW	GW	GL
SD01	1BS	2019NY	67.4	35.456	3.262	6.926
SD02	1BS	2019NY	64.4	44.811	3.511	7.279
SD03	1BS	2019NY	68.6	38.486	3.407	6.876
SD04	1BS	2019NY	62.6	45.461	3.51	7.47
SD05	1BS	2019NY	46.6	41.796	3.481	7.051
SD06	1RS	2019NY	73	44.936	3.666	7.081
SD07	1BS	2019NY	77	51.023	3.6	7.908
SD08	1BS	2019NY	36.2	39.281	3.241	7.524
SD09	1BS	2019NY	60.8	38.977	3.431	7.014
SD10	1BS	2019NY	83	43.403	3.514	7.166
SD11	1BS	2019NY	79	41.841	3.448	7.056
SD12	1BS	2019NY	76.2	43.674	3.49	7.37
SD13	1BS	2019NY	68.8	44.424	3.42	7.867
SD14	1RS	2019NY	68.4	40.22	3.317	6.833
SD15	1BS	2019NY	83.8	42.567	3.404	7.172
SD16	1BS	2019NY	71.4	41.752	3.436	7.014
SD17	1RS	2019NY	37.2	35.868	3.163	7.488
SD18	1BS	2019NY	37.2	37.811	3.253	7.39
SD19	1BS	2019NY	80.4	43.378	3.48	7.179
SD20	1BS	2019NY	56.4	39.674	3.344	7.181
SD21	1BS	2019NY	70.6	46.238	3.567	6.861
SD22	1BS	2019NY	75.4	42.744	3.414	7.198
SD23	1RS	2019NY	39.4	44.895	3.455	7.667
SD24	1RS	2019NY	54.4	45.004	3.55	7.985
SD25	1BS	2019NY	33.4	40.581	3.411	7.715
SD26	1BS	2019NY	85.2	42.227	3.536	6.815
SD27	1BS	2019NY	79.4	38.9	3.342	6.712
SD28	1BS	2019NY	79.4	45.406	3.61	6.907
SD29	1BS	2019NY	61.2	43.132	3.421	7.485
SD30	1BS	2019NY	62.2	39.151	3.373	7.097
SD31	1BS	2019NY	52.6	39.492	3.489	7
SD32	1BS	2019NY	79.8	44.781	3.484	7.499
SD33	1BS	2019NY	70.6	40.122	3.29	7.207
SD34	1BS	2019NY	66.4	40.481	3.517	6.936
SD35	1BS	2019NY	69.6	41.503	3.337	7.213
SD36	1BS	2019NY	67	48.563	3.565	7.899
SD37	1BS	2019NY	71	40.939	3.336	7.186
SD38	1RS	2019NY	90.2	41.537	3.46	7.059
SD39	1BS	2019NY	73.6	43.231	3.337	7.653
SD40	1BS	2019NY	45.6	36.387	3.24	7.351
SD41	1RS	2019NY	41.4	41.294	3.375	7.394
SD42	1BS	2019NY	59	27.903	2.846	6.597
SD43	1RS	2019NY	76.4	41.064	3.412	7.392
SD44	1BS	2019NY	75.8	40.394	3.468	6.668
SD45	1RS	2019NY	75.8	42.969	3.525	7.055
SD46	1RS	2019NY	70.8	43.119	3.248	7.967
SD47	1BS	2019NY	68.4	46.274	3.519	7.847
SD48	1BS	2019NY	73	41.605	3.447	6.934
SD49	1BS	2019NY	69.6	43.252	3.529	7.607
SD50	1BS	2019NY	41.8	28.835	2.965	7.209
SD51	1RS	2019NY	54.2	34.688	3.262	6.515
SD52	1BS	2019NY	59.8	39.914	3.368	6.957
SD53	1RS	2019NY	71.6	44.953	3.466	7.42
SD54	1BS	2019NY	57	39.763	3.27	7.507
SD55	1RS	2019NY	34	31.875	3.007	7.046
SD56	1BS	2019NY	73.2	44.888	3.546	7.178
SD57	1BS	2019NY	82.4	38.933	3.267	7.275
SD58	1BS	2019NY	90.6	39.623	3.251	7.245
SD59	1BS	2019NY	84.2	43.12	3.528	7.129
SD60	1BS	2019NY	74.6	43.36	3.514	7.269
SD61	1BS	2019NY	69	41.957	3.416	6.808
SD62	1BS	2019NY	80	45.683	3.591	7.214
SD63	1BS	2019NY	64.8	39.272	3.263	7.087
SD64	1BS	2019NY	83.8	49.293	3.561	7.701
SD65	1BS	2019NY	78.2	44.658	3.581	7.074
SD66	1BS	2019NY	74.4	41.559	3.402	7.306
SD67	1RS	2019NY	62.2	28.664	2.918	6.593
SD68	1BS	2019NY	60.2	35.929	3.263	6.702
SD69	1BS	2019NY	64.6	40.404	3.377	7.281
SD70	1BS	2019NY	82.8	40.251	3.276	7.843
SD71	1BS	2019NY	58.4	37.575	3.276	6.721
SD72	1BS	2019NY	59.2	36.643	3.371	6.726
SD73	1BS	2019NY	56.8	38.195	3.299	7.44
SD74	1BS	2019NY	57.2	38.459	3.259	7.295
SD75	1RS	2019NY	51.4	41.178	3.4	7.576
SD76	1BS	2019NY	65.6	38.409	3.33	7.4
SD77	1BS	2019NY	77.4	44.688	3.509	7.531
SD78	1BS	2019NY	70	44.992	3.486	7.186
SD79	1RS	2019NY	68.8	41.613	3.327	7.476
SD80	1BS	2019NY	71.4	38.067	3.26	6.802
SD81	1BS	2019NY	69.6	40.564	3.434	6.885
SD82	1BS	2019NY	71.8	44.355	3.427	7.425
SD83	1BS	2019NY	64.6	38.15	3.199	7.176
SD84	1BS	2019NY	62.2	39.014	3.327	7.149
SD85	1RS	2019NY	62.6	43.91	3.517	7.337
SD86	1BS	2019NY	77.2	38.996	3.462	7.099
SD87	1RS	2019NY	74.4	47.478	3.476	7.521
SD88	1RS	2019NY	71.6	37.983	3.256	7.003
SD89	1BS	2019NY	57	47.765	3.447	7.748
SD90	1BS	2019NY	60.6	40.704	3.353	7.05
SD91	1BS	2019NY	61.4	45.099	3.396	7.862
SD92	1BS	2019NY	61.4	45.83	3.518	7.519
SD93	1BS	2019NY	68.8	35.127	3.2	6.891
SD94	1BS	2019NY	81.4	41.907	3.333	7.258
SD95	1RS	2019NY	62.2	41.168	3.445	7.441
SD96	1BS	2019NY	70	NA	3.315	7.094
SD97	1BS	2019NY	61.4	33.893	3.104	7.214
SD98	1BS	2019NY	63	31.561	3.093	6.561
SD99	1BS	2019NY	69.2	38.09	3.384	6.789
SD100	1RS	2019NY	63.6	42.055	3.405	7.68
SD101	1BS	2019NY	52.8	36.956	3.223	6.742
SD102	1BS	2019NY	53.6	36.222	3.22	7.307
SD103	1BS	2019NY	58.8	41.469	3.315	7.409
SD104	1BS	2019NY	61.6	43.923	3.371	7.729
SD105	1RS	2019NY	66	41.685	3.325	7.483
SD106	1RS	2019NY	50.4	46.495	3.536	7.554
SD107	1BS	2019NY	73.2	40.724	3.388	7.061
SD108	1RS	2019NY	75	42.846	3.523	7.136
SD109	1RS	2019NY	63.6	44.792	3.539	7.31
SD110	1BS	2019NY	57.6	40.297	3.375	6.664
SD111	1RS	2019NY	96.8	39.142	3.494	7.915
SD112	1BS	2019NY	75.8	42.71	3.448	7.236
SD113	1RS	2019NY	82	43.275	3.527	7.848
SD114	1RS	2019NY	75	32.051	3.131	6.267
SD115	1BS	2019NY	69.8	42.258	3.514	7.093
SD116	1RS	2019NY	84.4	43.39	3.329	7.33
SD117	1BS	2019NY	83.4	42.852	3.33	7.282
SD118	1BS	2019NY	78.2	42.542	3.417	7.47
SD119	1BS	2019NY	82.2	29.914	2.914	7.083
SD120	1RS	2019NY	79.6	44.118	3.438	7.607
SD121	1RS	2019NY	32.2	29.356	2.812	7.78
SD122	1RS	2019NY	56.4	33.52	3.067	7.318
SD123	1RS	2019NY	86	41.464	3.412	6.923
SD124	1BS	2019NY	73.8	48.492	3.685	7.443
SD125	1BS	2019NY	68	37.788	3.158	6.973
SD126	1BS	2019NY	74.8	38.206	3.313	6.94
SD127	1BS	2019NY	65	42.669	3.392	7.31
SD128	1RS	2019NY	91.2	46.242	3.538	7.254
SD129	1BS	2019NY	91.2	33.55	3.128	6.587
SD130	1BS	2019NY	89.2	38.123	3.218	7.435
SD131	1BS	2019NY	86.6	42.748	3.455	7.386
SD132	1RS	2019NY	52	36.946	3.339	6.709
SD133	1BS	2019NY	46.6	36.9	3.192	7.564
SD134	1BS	2019NY	61.2	34.721	3.178	7.523
SD135	1BS	2019NY	74.6	40.342	3.28	7.174
SD136	1BS	2019NY	72.6	46.468	3.588	7.535
SD137	1RS	2019NY	36.2	35.673	3.201	7.018
SD138	1RS	2019NY	67.4	42.485	3.533	6.859
SD139	1RS	2019NY	50.2	43.246	3.22	8.041
SD140	1BS	2019NY	57.6	34.337	3.17	6.886
SD141	1BS	2019NY	41	34.477	3.112	7.482
SD142	1BS	2019NY	39.2	32.294	3.005	7.052
SD143	1RS	2019NY	83.2	42.302	3.437	7.008
SD144	1BS	2019NY	54.2	33.668	3.117	6.885
SD145	1BS	2019NY	67.2	43.819	3.473	7.5
SD146	1BS	2019NY	80.4	45.331	3.529	6.953
SD147	1RS	2019NY	86.4	41.809	3.528	7.063
SD148	1BS	2019NY	55.4	25.109	2.748	7.086
SD149	1BS	2019NY	76.6	45.371	3.427	7.658
SD150	1BS	2019NY	95.8	40.359	3.438	6.887
SD151	1RS	2019NY	65.8	40.041	3.349	7.604
SD152	1BS	2019NY	58.4	34.775	3.183	7.106
SD153	1BS	2019NY	80	44.209	3.518	7.188
SD154	1BS	2019NY	59.2	36.844	3.281	6.93
SD155	1BS	2019NY	46.6	42.331	3.297	7.495
SD156	1BS	2019NY	47.8	37.847	3.341	6.932
SD157	1BS	2019NY	72.4	35.654	3.161	6.886
SD158	1BS	2019NY	60.6	34.664	3.167	6.812
SD159	1BS	2019NY	63.8	42.481	3.502	7.063
SD160	1BS	2019NY	87	33.893	3.239	6.539
SD161	1BS	2019NY	70.6	44.641	3.644	7.245
SD162	1BS	2019NY	37.4	46.568	3.493	8.011
SD163	1RS	2019NY	76	33.438	3.21	6.692
SD164	1RS	2019NY	54.8	42.265	3.468	7.806
SD165	1BS	2019NY	82	38.285	3.35	6.763
SD166	1RS	2019NY	63.6	43.89	3.506	7.843
SD167	1BS	2019NY	67.2	42.32	3.466	7.434
SD168	1RS	2019NY	74.6	38.888	3.394	7.218
SD169	1BS	2019NY	85.8	44.013	3.409	7.511
SD170	1BS	2019NY	66.8	36.251	3.363	6.766
SD171	1BS	2019NY	45	28.357	3.009	6.691
SD172	1BS	2019NY	80.6	52.191	3.661	7.753
SD173	1RS	2019NY	54.4	41.677	3.316	7.895
SD174	1BS	2019NY	82.4	37.667	3.316	7.039
SD175	1BS	2019NY	73	45.153	3.574	7.299
SD176	1BS	2019NY	82.8	39.6	3.351	7.12
SD177	1RS	2019NY	53.2	35.883	3.158	7.205
SD178	1RS	2019NY	71.2	38.631	3.361	6.891
SD179	1BS	2019NY	90.2	38.582	3.328	6.764
SD180	1BS	2019NY	57.4	44.434	3.519	7.274
SD181	1BS	2019NY	60	38.375	3.293	7.224
SD182	1BS	2019NY	45	27.814	2.879	7.096
SD183	1RS	2019NY	84.8	43.323	3.61	6.956
SD184	1BS	2019NY	64	34.765	3.139	6.736
SD185	1BS	2019NY	80.4	38.844	3.365	6.741
SD186	1RS	2019NY	67.6	45.498	3.528	7.829
SD187	1BS	2019NY	71.8	42.349	3.477	7.495
SD188	1BS	2019NY	74.4	34.381	3.177	6.715
SD189	1BS	2019NY	47.2	36.145	3.278	6.602
SD190	1BS	2019NY	65	39.407	3.334	7.122
SD191	1BS	2019NY	52.8	39.683	3.191	7.849
SD192	1BS	2019NY	88.8	47.368	3.561	7.852
SD193	1RS	2019NY	62	40.349	3.245	7.384
SD194	1BS	2019NY	68.4	48.351	3.608	7.575
SD195	1BS	2019NY	73.6	43.395	3.499	7.099
SD196	1BS	2019NY	89.2	41.684	3.369	7.222
SD197	1BS	2019NY	69.4	36.922	3.186	7.784
SD198	1BS	2019NY	74.2	46.498	3.603	7.392
SD01	1BS	2020NY	77.6	41.75	3.528	6.772
SD02	1BS	2020NY	84	42.431	3.549	6.884
SD03	1BS	2020NY	92.6	38.975	3.409	6.589
SD04	1BS	2020NY	76.6	44.75	3.432	7.188
SD05	1BS	2020NY	58.6	45.052	3.628	7.049
SD06	1RS	2020NY	91	44.958	3.657	6.708
SD07	1BS	2020NY	90	51.51	3.718	7.512
SD08	1BS	2020NY	45.8	33.897	3.144	6.62
SD09	1BS	2020NY	74	43.273	3.552	6.886
SD10	1BS	2020NY	98	41.246	3.418	6.774
SD11	1BS	2020NY	96.8	41.097	3.449	6.815
SD12	1BS	2020NY	87.4	48.874	3.646	7.466
SD13	1BS	2020NY	85.2	46.305	3.473	7.462
SD14	1RS	2020NY	80.8	41.25	3.45	6.529
SD15	1BS	2020NY	94	50.408	3.741	7.287
SD16	1BS	2020NY	89.2	45.654	3.605	7.06
SD17	1RS	2020NY	51.4	36.562	3.258	6.872
SD18	1BS	2020NY	55.2	38.966	3.339	6.953
SD19	1BS	2020NY	101.4	45.626	3.519	6.729
SD20	1BS	2020NY	73.4	38.489	3.347	6.894
SD21	1BS	2020NY	90	47.205	3.53	6.612
SD22	1BS	2020NY	89.4	45.933	3.513	7.126
SD23	1RS	2020NY	68.8	50.7	3.723	7.158
SD24	1RS	2020NY	66.8	42.726	3.413	7.373
SD25	1BS	2020NY	43.4	39.138	3.379	7.481
SD26	1BS	2020NY	96.4	43.094	3.595	6.559
SD27	1BS	2020NY	88	40.397	3.434	6.569
SD28	1BS	2020NY	84.6	43.542	3.62	6.613
SD29	1BS	2020NY	74.2	41.805	3.461	7.12
SD30	1BS	2020NY	76	44.166	3.584	7.063
SD31	1BS	2020NY	68.8	39.612	3.396	6.783
SD32	1BS	2020NY	87.8	46.717	3.608	7.162
SD33	1BS	2020NY	80.4	43.783	3.41	7.444
SD34	1BS	2020NY	73.2	45.144	3.701	7.132
SD35	1BS	2020NY	74.8	34.367	3.049	7.054
SD36	1BS	2020NY	72.6	47.251	3.474	7.605
SD37	1BS	2020NY	73.8	39.298	3.264	7.023
SD38	1RS	2020NY	101.8	43.682	3.53	6.886
SD39	1BS	2020NY	86.8	45.004	3.467	7.367
SD40	1BS	2020NY	48.6	37.134	3.267	7.037
SD41	1RS	2020NY	49.6	46.858	3.542	7.306
SD42	1BS	2020NY	72.6	43.622	3.424	7.134
SD43	1RS	2020NY	86	44.779	3.514	7.329
SD44	1BS	2020NY	89.4	41.373	3.479	6.433
SD45	1RS	2020NY	84	43.102	3.621	6.479
SD46	1RS	2020NY	77.6	45.088	3.396	7.724
SD47	1BS	2020NY	79.2	45.846	3.446	7.79
SD48	1BS	2020NY	88	44.821	3.693	6.951
SD49	1BS	2020NY	83.2	35.656	3.135	6.81
SD50	1BS	2020NY	50.6	37.141	3.237	7.326
SD51	1RS	2020NY	69.4	35.528	3.314	6.342
SD52	1BS	2020NY	77	40.438	3.435	6.713
SD53	1RS	2020NY	84.4	44.46	3.528	7.092
SD54	1BS	2020NY	76.2	46.017	3.487	7.285
SD55	1RS	2020NY	40.2	32.579	3.136	6.911
SD56	1BS	2020NY	82.4	42.334	3.497	6.884
SD57	1BS	2020NY	100.2	39.838	3.349	7.03
SD58	1BS	2020NY	101.6	38.791	3.296	6.889
SD59	1BS	2020NY	89.6	48.908	3.66	7.214
SD60	1BS	2020NY	84.8	41.849	3.447	6.974
SD61	1BS	2020NY	90.8	41.677	3.415	6.781
SD62	1BS	2020NY	91.6	51.758	3.78	7.179
SD63	1BS	2020NY	74.2	43.105	3.424	7.142
SD64	1BS	2020NY	102.4	55.402	3.782	7.672
SD65	1BS	2020NY	91.2	47.37	3.711	6.808
SD66	1BS	2020NY	97.2	40.569	3.399	6.996
SD67	1RS	2020NY	79.8	33.329	3.115	6.489
SD68	1BS	2020NY	74.4	34.07	3.153	6.376
SD69	1BS	2020NY	95	44.781	3.556	7.533
SD70	1BS	2020NY	95.6	46.073	3.495	7.715
SD71	1BS	2020NY	70.2	37.623	3.386	6.807
SD72	1BS	2020NY	72.2	40.966	3.476	6.501
SD73	1BS	2020NY	67.2	38.437	3.302	7.263
SD74	1BS	2020NY	69.2	41.821	3.377	7.379
SD75	1RS	2020NY	67.8	42.198	3.472	7.522
SD76	1BS	2020NY	93.6	42.097	3.433	6.991
SD77	1BS	2020NY	98	41.872	3.399	7.24
SD78	1BS	2020NY	88.6	47.695	3.641	7.519
SD79	1RS	2020NY	82	44.895	3.499	7.589
SD80	1BS	2020NY	100.8	43.239	3.515	6.855
SD81	1BS	2020NY	96.6	39.11	3.25	6.783
SD82	1BS	2020NY	87	36.493	3.265	6.943
SD83	1BS	2020NY	82.6	40.133	3.284	6.945
SD84	1BS	2020NY	79	36.39	3.227	7.054
SD85	1RS	2020NY	84.6	45.675	3.612	7.299
SD86	1BS	2020NY	99.2	46.743	3.678	7.319
SD87	1RS	2020NY	87.6	50.735	3.657	7.387
SD88	1RS	2020NY	92.4	41.785	3.408	7.069
SD89	1BS	2020NY	66.2	44.897	3.439	7.68
SD90	1BS	2020NY	73.4	45.301	3.516	7.051
SD91	1BS	2020NY	66	37.029	3.029	7.715
SD92	1BS	2020NY	76.2	46.293	3.5	7.66
SD93	1BS	2020NY	76.6	36.768	3.33	6.999
SD94	1BS	2020NY	98.2	39.343	3.288	6.744
SD95	1RS	2020NY	73.8	40.048	3.471	7.231
SD96	1BS	2020NY	77.6	43.545	3.423	6.605
SD97	1BS	2020NY	74.6	38.958	3.407	7.256
SD98	1BS	2020NY	68.2	31.98	3.225	6.419
SD99	1BS	2020NY	89.2	39.674	3.536	6.745
SD100	1RS	2020NY	67.2	45.406	3.487	7.531
SD101	1BS	2020NY	69.6	39.681	3.312	6.554
SD102	1BS	2020NY	66.4	37.088	3.21	7.496
SD103	1BS	2020NY	71.8	45.57	3.408	7.456
SD104	1BS	2020NY	70.4	40.781	3.298	7.279
SD105	1RS	2020NY	75	43.5	3.354	7.215
SD106	1RS	2020NY	58.6	45.617	3.531	7.645
SD107	1BS	2020NY	97	41.045	3.447	6.824
SD108	1RS	2020NY	90.8	42.451	3.567	6.87
SD109	1RS	2020NY	89.4	44.073	3.541	7.194
SD110	1BS	2020NY	64.8	43.583	3.626	6.851
SD111	1RS	2020NY	109.8	38.42	3.414	7.115
SD112	1BS	2020NY	95.8	47.385	3.662	7.238
SD113	1RS	2020NY	89.8	47.972	3.712	7.833
SD114	1RS	2020NY	96	45.031	3.663	6.885
SD115	1BS	2020NY	96.2	44.322	3.591	7.069
SD116	1RS	2020NY	99	47.169	3.534	7.209
SD117	1BS	2020NY	105.6	44.872	3.476	7.007
SD118	1BS	2020NY	86.8	38.515	3.333	7.439
SD119	1BS	2020NY	91	31.256	3.108	6.698
SD120	1RS	2020NY	91	45.622	3.549	7.421
SD121	1RS	2020NY	43.4	32.801	3.034	7.721
SD122	1RS	2020NY	64	37.083	3.182	7.456
SD123	1RS	2020NY	92.6	44.516	3.625	7.106
SD124	1BS	2020NY	77.4	44.005	3.551	7.343
SD125	1BS	2020NY	83.4	40.146	3.359	6.876
SD126	1BS	2020NY	85	45.633	3.646	7.272
SD127	1BS	2020NY	72.4	45.645	3.446	7.341
SD128	1RS	2020NY	101.2	47.051	3.603	7.141
SD129	1BS	2020NY	67.6	38.207	3.313	6.514
SD130	1BS	2020NY	99.6	42.199	3.426	7.259
SD131	1BS	2020NY	96.6	45.485	3.54	7.512
SD132	1RS	2020NY	67.6	38	3.385	6.725
SD133	1BS	2020NY	56.8	40.869	3.395	7.383
SD134	1BS	2020NY	69.8	40.221	3.348	7.412
SD135	1BS	2020NY	85.8	45.42	3.471	7.269
SD136	1BS	2020NY	87.4	48.825	3.724	7.346
SD137	1RS	2020NY	52	36.858	3.231	6.672
SD138	1RS	2020NY	80.8	43.392	3.657	6.782
SD139	1RS	2020NY	58.2	43.889	3.329	7.873
SD140	1BS	2020NY	73.4	38.992	3.34	6.776
SD141	1BS	2020NY	56.4	39.98	3.399	7.558
SD142	1BS	2020NY	51.6	44.625	3.532	7.343
SD143	1RS	2020NY	85.6	47.442	3.624	7.011
SD144	1BS	2020NY	61.2	33.113	3.197	6.713
SD145	1BS	2020NY	80.8	50.611	3.693	7.341
SD146	1BS	2020NY	97.4	48.71	3.693	6.885
SD147	1RS	2020NY	98	43.876	3.495	6.851
SD148	1BS	2020NY	68.8	41.16	3.413	7.488
SD149	1BS	2020NY	92.2	45.763	3.514	7.301
SD150	1BS	2020NY	105.8	44.053	3.553	6.857
SD151	1RS	2020NY	74.6	36.303	3.228	7.408
SD152	1BS	2020NY	70	37.977	3.261	6.845
SD153	1BS	2020NY	97.4	40.823	3.546	7.096
SD154	1BS	2020NY	78.6	41.19	3.43	7.002
SD155	1BS	2020NY	58.4	34.792	3.076	7.09
SD156	1BS	2020NY	63.6	38.48	3.316	6.897
SD157	1BS	2020NY	91.6	35.869	3.344	6.784
SD158	1BS	2020NY	68.8	48.235	3.699	7.091
SD159	1BS	2020NY	70.8	40.25	3.37	6.893
SD160	1BS	2020NY	91	45.48	3.601	7.091
SD161	1BS	2020NY	89.4	44.083	3.383	8.027
SD162	1BS	2020NY	47.4	30.951	3.061	5.944
SD163	1RS	2020NY	88.4	35.851	3.285	6.504
SD164	1RS	2020NY	70.6	46.117	3.53	7.645
SD165	1BS	2020NY	84.2	42.426	3.428	7.365
SD166	1RS	2020NY	70.6	45.258	3.526	7.601
SD167	1BS	2020NY	81	45.469	3.563	7.151
SD168	1RS	2020NY	89.4	44.985	3.496	7.138
SD169	1BS	2020NY	100	34.6	3.22	6.638
SD170	1BS	2020NY	76	31.33	3.069	6.469
SD171	1BS	2020NY	51	26.279	2.812	6.825
SD172	1BS	2020NY	85.2	47.538	3.548	7.367
SD173	1RS	2020NY	92.6	45.464	3.418	7.857
SD174	1BS	2020NY	84.8	41.619	3.426	7.349
SD175	1BS	2020NY	89.2	47.059	3.672	7.126
SD176	1BS	2020NY	88	45.46	3.482	7.275
SD177	1RS	2020NY	69.8	33.912	3.157	6.767
SD178	1RS	2020NY	89.4	42.295	3.454	6.979
SD179	1BS	2020NY	92	40.566	3.45	6.846
SD180	1BS	2020NY	65.6	29.732	2.894	6.907
SD181	1BS	2020NY	79.4	43.195	3.456	6.915
SD182	1BS	2020NY	54.8	27.703	2.82	6.82
SD183	1RS	2020NY	91	46.837	3.64	7.08
SD184	1BS	2020NY	81.2	37.298	3.195	6.708
SD185	1BS	2020NY	91.8	46.598	3.565	6.902
SD186	1RS	2020NY	93.8	43.381	3.375	7.53
SD187	1BS	2020NY	76.8	48.055	3.661	7.538
SD188	1BS	2020NY	83.8	40.146	3.413	6.9
SD189	1BS	2020NY	63	46.583	3.695	6.664
SD190	1BS	2020NY	80.8	41.447	3.415	6.915
SD191	1BS	2020NY	64.6	41.423	3.465	7.603
SD192	1BS	2020NY	97.6	50.777	3.66	7.724
SD193	1RS	2020NY	78.6	42.911	3.326	7.154
SD194	1BS	2020NY	90.4	44.892	3.646	7.261
SD195	1BS	2020NY	83.8	46.982	3.57	7.161
SD196	1BS	2020NY	96.8	43.062	3.487	7.247
SD197	1BS	2020NY	74.2	41.309	3.417	7.198
SD198	1BS	2020NY	82.4	56.379	3.825	7.921
SD01	1BS	2019YL	55.2	46.577	3.699	7.454
SD02	1BS	2019YL	56.2	37.652	3.334	6.678
SD03	1BS	2019YL	59	42.75	3.555	7.157
SD04	1BS	2019YL	68.1	40.908	3.535	7.022
SD05	1BS	2019YL	63.2	52.548	3.793	7.676
SD06	1RS	2019YL	49.3	38.553	3.359	7.138
SD07	1BS	2019YL	76.3	50.918	3.903	7.252
SD08	1BS	2019YL	43.8	34.4	3.108	7.061
SD09	1BS	2019YL	65.2	46.574	3.722	7.199
SD10	1BS	2019YL	83.6	44.995	3.555	7.158
SD11	1BS	2019YL	86.2	40.815	3.413	6.947
SD12	1BS	2019YL	78.5	46.715	3.584	7.75
SD13	1BS	2019YL	76.2	46.493	3.582	7.773
SD14	1RS	2019YL	62.5	40.572	3.409	6.932
SD15	1BS	2019YL	84.9	47.773	3.644	7.352
SD16	1BS	2019YL	72.2	46.164	3.644	7.243
SD17	1RS	2019YL	41.1	40.019	3.311	7.549
SD18	1BS	2019YL	45.6	38.42	3.334	7.273
SD19	1BS	2019YL	85.9	46.829	3.632	7.133
SD20	1BS	2019YL	60.1	45.429	3.56	7.1
SD21	1BS	2019YL	77.6	49.662	3.704	7.072
SD22	1BS	2019YL	83.5	45.076	3.576	7.297
SD23	1RS	2019YL	47.3	46.022	3.565	7.416
SD24	1RS	2019YL	55	45.536	3.499	7.522
SD25	1BS	2019YL	38.5	46.063	3.553	7.602
SD26	1BS	2019YL	84	47.89	3.795	7.012
SD27	1BS	2019YL	82.5	48.81	3.783	6.971
SD28	1BS	2019YL	80	47.652	3.789	7.107
SD29	1BS	2019YL	64.1	48.995	3.767	7.46
SD30	1BS	2019YL	68.5	49.973	3.798	7.364
SD31	1BS	2019YL	45.5	NA	3.501	7.269
SD32	1BS	2019YL	74	45.57	3.567	7.464
SD33	1BS	2019YL	71.2	51.602	3.715	7.762
SD34	1BS	2019YL	65	48.336	3.838	7.174
SD35	1BS	2019YL	68.9	50.438	3.735	7.66
SD36	1BS	2019YL	65.1	50.136	3.595	8.061
SD37	1BS	2019YL	66.6	50.629	NA	NA
SD38	1RS	2019YL	83.4	38.577	3.453	6.818
SD39	1BS	2019YL	72.8	51.479	3.725	7.831
SD40	1BS	2019YL	48.3	41.606	3.47	7.314
SD41	1RS	2019YL	46.3	48.938	3.715	7.629
SD42	1BS	2019YL	73.8	47.879	3.576	7.439
SD43	1RS	2019YL	74.1	43.432	3.479	7.634
SD44	1BS	2019YL	82.9	46.796	3.7	7.417
SD45	1RS	2019YL	90.3	48.237	3.655	7.672
SD46	1RS	2019YL	71.4	43.182	3.38	7.793
SD47	1BS	2019YL	72.1	50.289	3.633	8.214
SD48	1BS	2019YL	74.3	47.79	3.808	7.165
SD49	1BS	2019YL	69	54.008	3.878	7.692
SD50	1BS	2019YL	44.9	38.419	3.355	7.72
SD51	1RS	2019YL	50.2	38.48	3.386	6.842
SD52	1BS	2019YL	55	46.658	3.682	7.175
SD53	1RS	2019YL	66.3	50.544	3.733	7.601
SD54	1BS	2019YL	62.7	45.071	3.487	7.309
SD55	1RS	2019YL	34.6	37.872	3.268	7.12
SD56	1BS	2019YL	63.6	42.972	3.573	7.256
SD57	1BS	2019YL	65.8	46.928	3.753	7.227
SD58	1BS	2019YL	84.9	42.152	3.43	7.459
SD59	1BS	2019YL	67.4	46.894	3.671	7.459
SD60	1BS	2019YL	68.9	50.112	3.805	7.299
SD61	1BS	2019YL	63.8	47.521	3.767	7.277
SD62	1BS	2019YL	70.2	50.656	3.771	7.45
SD63	1BS	2019YL	63.2	43.737	3.431	7.303
SD64	1BS	2019YL	73.6	51.63	3.668	7.849
SD65	1BS	2019YL	76.3	45.112	3.703	7.089
SD66	1BS	2019YL	77.2	46.901	3.705	7.537
SD67	1RS	2019YL	56.4	39.781	3.455	6.875
SD68	1BS	2019YL	65.1	41.202	3.539	6.833
SD69	1BS	2019YL	62	46.681	3.69	7.541
SD70	1BS	2019YL	82.1	50.427	3.734	8.009
SD71	1BS	2019YL	58.3	42.167	3.502	7.053
SD72	1BS	2019YL	58.7	41.449	3.555	6.759
SD73	1BS	2019YL	57.2	41.308	3.389	7.532
SD74	1BS	2019YL	50.1	36.576	3.411	7.007
SD75	1RS	2019YL	60.5	51.707	3.794	7.804
SD76	1BS	2019YL	71	41.866	3.444	7.572
SD77	1BS	2019YL	84.7	46.379	3.574	7.743
SD78	1BS	2019YL	75.2	50.839	3.773	7.396
SD79	1RS	2019YL	69.9	44.72	3.491	7.608
SD80	1BS	2019YL	86.4	39.957	3.428	6.997
SD81	1BS	2019YL	74.9	50.875	3.834	7.227
SD82	1BS	2019YL	75.2	53.643	3.852	7.66
SD83	1BS	2019YL	70.5	45.423	3.476	7.463
SD84	1BS	2019YL	73.4	47.937	3.681	7.331
SD85	1RS	2019YL	73.4	45.567	3.62	7.438
SD86	1BS	2019YL	84.8	51.68	3.768	7.423
SD87	1RS	2019YL	87.4	55.049	3.83	7.859
SD88	1RS	2019YL	50.5	38.236	3.483	7.281
SD89	1BS	2019YL	52.7	52.665	3.735	8.193
SD90	1BS	2019YL	69.5	43.922	3.579	7.104
SD91	1BS	2019YL	63.6	48.117	3.566	8.109
SD92	1BS	2019YL	66.8	51.737	3.81	7.901
SD93	1BS	2019YL	67.7	48.61	3.67	7.392
SD94	1BS	2019YL	78.5	45.233	3.52	7.327
SD95	1RS	2019YL	74.8	44.577	3.616	7.527
SD96	1BS	2019YL	69.6	44.513	3.568	7.124
SD97	1BS	2019YL	61.3	45.065	3.609	7.516
SD98	1BS	2019YL	62.1	43.39	3.672	7.036
SD99	1BS	2019YL	60	42.294	3.621	7.165
SD100	1RS	2019YL	58	43.636	3.429	7.879
SD101	1BS	2019YL	53.8	45.294	3.552	7.071
SD102	1BS	2019YL	53.8	44.317	3.502	7.687
SD103	1BS	2019YL	65.8	48.813	3.599	7.581
SD104	1BS	2019YL	67.1	48.014	3.612	7.62
SD105	1RS	2019YL	71.1	46.674	3.564	7.529
SD106	1RS	2019YL	56.9	48.402	3.676	7.697
SD107	1BS	2019YL	82.1	42.07	3.611	7.289
SD108	1RS	2019YL	82.3	45.779	NA	NA
SD109	1RS	2019YL	51.9	42.768	3.631	7.361
SD110	1BS	2019YL	56.8	45.624	3.659	6.879
SD111	1RS	2019YL	83.7	47.142	3.756	8.206
SD112	1BS	2019YL	74.1	52.801	3.873	7.461
SD113	1RS	2019YL	79.4	49.086	3.744	7.876
SD114	1RS	2019YL	82.8	44.374	3.687	6.8
SD115	1BS	2019YL	82.8	46.396	3.714	7.402
SD116	1RS	2019YL	90.9	53.116	3.813	7.571
SD117	1BS	2019YL	81.4	50.675	NA	NA
SD118	1BS	2019YL	77.5	40.907	3.466	7.622
SD119	1BS	2019YL	79.8	41.722	3.479	7.372
SD120	1RS	2019YL	70.4	52.477	3.85	8.125
SD121	1RS	2019YL	35.7	34.708	3.16	7.814
SD122	1RS	2019YL	36.7	35.368	3.271	7.428
SD123	1RS	2019YL	82.3	42.953	3.57	7.079
SD124	1BS	2019YL	80.2	45.966	3.64	7.158
SD125	1BS	2019YL	64.7	45.689	3.687	7.599
SD126	1BS	2019YL	57.3	42.331	3.568	7.299
SD127	1BS	2019YL	61.4	46.155	3.477	7.795
SD128	1RS	2019YL	75.2	42.903	3.539	7.47
SD129	1BS	2019YL	54.1	35.38	3.33	6.837
SD130	1BS	2019YL	84.9	47.142	3.719	7.759
SD131	1BS	2019YL	77.4	46.199	3.618	7.326
SD132	1RS	2019YL	56.5	45.506	3.698	7.148
SD133	1BS	2019YL	46.8	51.467	3.681	7.115
SD134	1BS	2019YL	45.3	37.94	3.312	7.486
SD135	1BS	2019YL	70.7	37.67	3.308	7.204
SD136	1BS	2019YL	70.4	50.135	3.759	7.875
SD137	1RS	2019YL	46.5	42.651	3.49	7.401
SD138	1RS	2019YL	64.5	41.941	3.577	6.959
SD139	1RS	2019YL	59.7	44.635	3.461	7.806
SD140	1BS	2019YL	50.6	51.154	3.654	8.045
SD141	1BS	2019YL	63.9	47.822	3.72	7.302
SD142	1BS	2019YL	77	39.874	3.426	7.044
SD143	1RS	2019YL	42.9	35.601	3.354	7.078
SD144	1BS	2019YL	63.2	51.019	3.877	7.408
SD145	1BS	2019YL	46.1	37.934	3.409	7.456
SD146	1BS	2019YL	54.3	46.749	3.652	7.452
SD147	1RS	2019YL	65.1	48.367	3.765	7.57
SD148	1BS	2019YL	84.5	51.322	3.902	7.229
SD149	1BS	2019YL	61	49.104	3.702	7.61
SD150	1BS	2019YL	80.7	48.44	3.79	7.712
SD151	1RS	2019YL	85.7	45.465	3.55	7.538
SD152	1BS	2019YL	65.8	44.03	3.552	7.833
SD153	1BS	2019YL	53	41.151	3.463	7.529
SD154	1BS	2019YL	76.2	45.348	3.702	7.718
SD155	1BS	2019YL	59.5	47.439	3.799	7.503
SD156	1BS	2019YL	46	49.461	3.775	7.763
SD157	1BS	2019YL	67.6	41.296	3.444	6.971
SD158	1BS	2019YL	64.1	49.826	3.654	7.94
SD159	1BS	2019YL	72.4	43.829	3.603	7.446
SD160	1BS	2019YL	57.4	45.591	3.67	7.258
SD161	1BS	2019YL	57.7	48.175	3.768	7.518
SD162	1BS	2019YL	82	46.175	3.601	7.182
SD163	1RS	2019YL	66.8	49.709	3.848	7.49
SD164	1RS	2019YL	36.4	48.429	3.592	8.173
SD165	1BS	2019YL	74.5	44.376	3.624	7.083
SD166	1RS	2019YL	52.6	44.032	3.546	8.135
SD167	1BS	2019YL	65.2	46.896	3.613	7.827
SD168	1RS	2019YL	64.8	39.491	3.472	7.433
SD169	1BS	2019YL	75.1	48.188	3.568	7.892
SD170	1BS	2019YL	61.9	44.665	3.705	7.1
SD171	1BS	2019YL	43.1	34.221	3.338	6.997
SD172	1BS	2019YL	77	54.286	3.77	7.835
SD173	1RS	2019YL	51.3	46.987	3.487	8.201
SD174	1BS	2019YL	73	40.018	3.435	7.406
SD175	1BS	2019YL	66.2	50.381	3.754	7.408
SD176	1BS	2019YL	78	44.391	3.574	7.379
SD177	1RS	2019YL	52.8	39.043	3.31	7.248
SD178	1RS	2019YL	65.6	46.128	3.71	7.494
SD179	1BS	2019YL	76.9	41.518	3.506	7.095
SD180	1BS	2019YL	53.4	47.418	3.677	7.601
SD181	1BS	2019YL	49.7	47.022	3.58	7.549
SD182	1BS	2019YL	41.6	43.515	3.48	7.701
SD183	1RS	2019YL	72.3	41.579	3.617	7.306
SD184	1BS	2019YL	56.7	37.748	3.29	7.23
SD185	1BS	2019YL	74.8	44.939	3.599	7.149
SD186	1RS	2019YL	54.2	45.277	3.45	7.794
SD187	1BS	2019YL	55.1	44.756	3.54	7.554
SD188	1BS	2019YL	64.7	36.7	3.273	6.937
SD189	1BS	2019YL	44.3	43.301	3.651	7.037
SD190	1BS	2019YL	59.2	39.286	3.363	7.28
SD191	1BS	2019YL	51.2	53.183	3.737	8.426
SD192	1BS	2019YL	84.1	51.948	3.827	8.137
SD193	1RS	2019YL	64.3	43.71	3.383	7.796
SD194	1BS	2019YL	67.6	50.979	3.788	7.831
SD195	1BS	2019YL	64.6	42.237	3.533	7.206
SD196	1BS	2019YL	78	46.364	3.588	7.613
SD197	1BS	2019YL	65.5	48.596	3.656	8.227
SD198	1BS	2019YL	73.3	49.548	3.803	7.852
SD01	1BS	2020YL	61.2	46.698	3.735	7.501
SD02	1BS	2020YL	61.1	37.48	3.387	6.807
SD03	1BS	2020YL	67	45.467	3.753	7.315
SD04	1BS	2020YL	69	42.389	3.629	7.035
SD05	1BS	2020YL	60.4	50.36	3.753	7.641
SD06	1RS	2020YL	52.9	35.214	3.322	7.361
SD07	1BS	2020YL	83.8	50.701	3.865	7.209
SD08	1BS	2020YL	38.3	38.341	3.286	7.541
SD09	1BS	2020YL	72.2	43.256	3.658	7.081
SD10	1BS	2020YL	89.2	42.223	3.53	7.245
SD11	1BS	2020YL	89	41.789	3.486	7.075
SD12	1BS	2020YL	70.6	45.897	3.619	7.96
SD13	1BS	2020YL	71.11	47.241	3.647	7.796
SD14	1RS	2020YL	68.7	43.461	3.536	7.079
SD15	1BS	2020YL	83.7	35.584	3.438	7.371
SD16	1BS	2020YL	79.6	45.864	3.697	7.3
SD17	1RS	2020YL	44.8	38.079	3.212	7.526
SD18	1BS	2020YL	51.1	33.253	3.164	7.066
SD19	1BS	2020YL	97.9	47.93	3.704	7.209
SD20	1BS	2020YL	69.8	50.515	3.708	7.383
SD21	1BS	2020YL	84.4	39.427	3.385	6.668
SD22	1BS	2020YL	86.4	46.128	3.626	7.356
SD23	1RS	2020YL	47.4	47.678	3.701	7.878
SD24	1RS	2020YL	56	42.137	3.521	7.499
SD25	1BS	2020YL	39.7	39.89	3.425	7.802
SD26	1BS	2020YL	109.2	40.083	3.569	6.82
SD27	1BS	2020YL	84.2	41.742	3.591	7.097
SD28	1BS	2020YL	84.1	51.304	3.879	7.336
SD29	1BS	2020YL	70.1	50.496	3.841	7.471
SD30	1BS	2020YL	74.4	51.376	3.864	7.411
SD31	1BS	2020YL	48.5	33.821	3.256	7.291
SD32	1BS	2020YL	76.4	49.351	3.753	7.729
SD33	1BS	2020YL	59.9	51.1	3.719	8.034
SD34	1BS	2020YL	69.7	50.004	3.852	7.553
SD35	1BS	2020YL	64.7	49.29	3.733	7.83
SD36	1BS	2020YL	66.5	52.444	3.729	8.242
SD37	1BS	2020YL	66.6	50.721	3.689	7.824
SD38	1RS	2020YL	87.7	36.392	3.336	7.057
SD39	1BS	2020YL	79.3	49.568	3.635	7.802
SD40	1BS	2020YL	45	43.17	3.575	7.535
SD41	1RS	2020YL	43.9	46.284	3.619	7.98
SD42	1BS	2020YL	64.7	50.838	3.699	7.614
SD43	1RS	2020YL	73.5	42.122	3.543	7.762
SD44	1BS	2020YL	88	46.632	3.677	7.524
SD45	1RS	2020YL	66.6	43.995	3.53	7.745
SD46	1RS	2020YL	65.3	47.353	3.515	8.434
SD47	1BS	2020YL	73.1	51.084	3.703	8.424
SD48	1BS	2020YL	78.4	47.211	3.816	7.356
SD49	1BS	2020YL	69.4	49.144	3.663	7.801
SD50	1BS	2020YL	50.6	41.87	3.447	8.088
SD51	1RS	2020YL	63.7	36.368	3.368	6.763
SD52	1BS	2020YL	69.4	43.039	3.547	7.099
SD53	1RS	2020YL	72.9	44.991	3.56	7.369
SD54	1BS	2020YL	71.7	41.331	3.317	7.797
SD55	1RS	2020YL	41.7	45.153	3.626	7.605
SD56	1BS	2020YL	63.8	39.798	3.543	7.248
SD57	1BS	2020YL	68.3	43.554	3.685	7.425
SD58	1BS	2020YL	94.2	39.897	3.446	7.516
SD59	1BS	2020YL	66.9	40.977	3.483	7.244
SD60	1BS	2020YL	85.3	49.049	3.746	7.461
SD61	1BS	2020YL	77.9	46.004	3.747	7.449
SD62	1BS	2020YL	81.2	47.718	3.76	7.382
SD63	1BS	2020YL	78.5	45.155	3.569	7.413
SD64	1BS	2020YL	75	51.067	3.738	8.031
SD65	1BS	2020YL	85.9	48.412	3.834	7.297
SD66	1BS	2020YL	89.5	47.257	3.675	7.556
SD67	1RS	2020YL	72.5	42	3.577	6.887
SD68	1BS	2020YL	66.2	40.713	3.58	7.116
SD69	1BS	2020YL	69.8	49.699	3.855	7.703
SD70	1BS	2020YL	103.8	50.131	3.68	8
SD71	1BS	2020YL	67.8	NA	3.36	6.827
SD72	1BS	2020YL	72.1	40.21	3.611	6.933
SD73	1BS	2020YL	65.1	47.231	3.648	7.735
SD74	1BS	2020YL	56.2	39.175	3.555	7.216
SD75	1RS	2020YL	57.1	51.633	3.784	8.063
SD76	1BS	2020YL	69.5	39.637	3.447	7.674
SD77	1BS	2020YL	97.1	45.341	3.542	7.765
SD78	1BS	2020YL	77.3	48.236	3.755	7.329
SD79	1RS	2020YL	81	41.66	3.388	7.694
SD80	1BS	2020YL	98	38.899	3.37	6.987
SD81	1BS	2020YL	72.1	46.432	3.696	6.95
SD82	1BS	2020YL	75.6	40.695	3.45	7.278
SD83	1BS	2020YL	74	37.862	3.198	7.567
SD84	1BS	2020YL	63.6	47.695	3.756	7.581
SD85	1RS	2020YL	72.5	50.285	3.859	7.939
SD86	1BS	2020YL	95	48.538	3.703	7.546
SD87	1RS	2020YL	91	54.826	3.803	7.813
SD88	1RS	2020YL	53.7	40.966	3.408	7.358
SD89	1BS	2020YL	57.5	40.949	3.321	7.915
SD90	1BS	2020YL	61.5	44.622	3.613	7.416
SD91	1BS	2020YL	63.5	43.645	3.454	8.206
SD92	1BS	2020YL	72.5	46.837	3.615	7.772
SD93	1BS	2020YL	70.1	44.632	3.59	7.377
SD94	1BS	2020YL	91.8	43.563	3.483	7.386
SD95	1RS	2020YL	85.9	47.696	3.75	7.712
SD96	1BS	2020YL	63.3	41.802	3.485	7.068
SD97	1BS	2020YL	65.5	48.93	3.75	7.64
SD98	1BS	2020YL	63.6	44.368	3.703	7.087
SD99	1BS	2020YL	64.2	40.914	3.54	7.178
SD100	1RS	2020YL	61.3	47.101	3.616	8.041
SD101	1BS	2020YL	67.8	43.212	3.493	7.034
SD102	1BS	2020YL	65.4	41.934	3.334	7.519
SD103	1BS	2020YL	72.6	45.291	3.568	7.507
SD104	1BS	2020YL	67.3	44.435	3.496	7.571
SD105	1RS	2020YL	72.7	42.236	3.374	7.36
SD106	1RS	2020YL	49.2	46.107	3.557	7.71
SD107	1BS	2020YL	88.5	43.561	3.669	7.229
SD108	1RS	2020YL	88.5	48.336	3.795	7.472
SD109	1RS	2020YL	57.6	48.817	3.734	7.622
SD110	1BS	2020YL	61.5	40.968	3.528	6.909
SD111	1RS	2020YL	97.7	46.705	3.759	8.18
SD112	1BS	2020YL	88.5	54.54	3.946	7.573
SD113	1RS	2020YL	88.1	50.218	3.801	8.149
SD114	1RS	2020YL	94.2	45.291	3.683	6.769
SD115	1BS	2020YL	87.5	47.595	3.768	7.467
SD116	1RS	2020YL	102.04	54.822	3.827	7.609
SD117	1BS	2020YL	101.7	52.564	3.737	7.661
SD118	1BS	2020YL	85.1	50.827	3.672	7.815
SD119	1BS	2020YL	85.5	29.496	3.086	7.302
SD120	1RS	2020YL	84.1	47.963	3.692	7.868
SD121	1RS	2020YL	38.8	45.583	3.56	8.349
SD122	1RS	2020YL	44	39.719	3.443	7.319
SD123	1RS	2020YL	100.3	42.728	3.536	6.882
SD124	1BS	2020YL	90.5	48.721	3.707	7.286
SD125	1BS	2020YL	71.3	47.618	3.749	7.27
SD126	1BS	2020YL	64.2	41.611	3.554	7.208
SD127	1BS	2020YL	70.3	48.97	3.642	7.618
SD128	1RS	2020YL	69.7	39.516	3.369	7.48
SD129	1BS	2020YL	64.6	40.691	3.559	6.868
SD130	1BS	2020YL	98.2	47.168	3.698	7.717
SD131	1BS	2020YL	77	45.927	3.602	7.428
SD132	1RS	2020YL	59.8	48.448	3.796	7.249
SD133	1BS	2020YL	54	45.566	3.53	7.782
SD134	1BS	2020YL	44.4	40.974	3.427	7.783
SD135	1BS	2020YL	70.2	42.031	3.482	7.664
SD136	1BS	2020YL	79.3	49.183	3.667	7.847
SD137	1RS	2020YL	51.2	42.898	3.434	7.701
SD138	1RS	2020YL	59.2	40.733	3.544	7.223
SD139	1RS	2020YL	61.9	48.614	3.722	8.091
SD140	1BS	2020YL	56.6	52.426	3.614	8.506
SD141	1BS	2020YL	68.1	47.533	3.702	7.278
SD142	1BS	2020YL	92.2	43.26	3.574	6.946
SD143	1RS	2020YL	42.2	42.9	3.605	7.502
SD144	1BS	2020YL	73.5	51.323	3.828	7.715
SD145	1BS	2020YL	45.2	40.008	3.467	7.66
SD146	1BS	2020YL	57.5	49.61	3.697	7.526
SD147	1RS	2020YL	62.7	52.004	3.755	8.208
SD148	1BS	2020YL	93.7	47.527	3.676	7.182
SD149	1BS	2020YL	68.8	44.559	3.516	8.057
SD150	1BS	2020YL	80.5	46.141	3.632	7.916
SD151	1RS	2020YL	95.6	46.199	3.639	7.732
SD152	1BS	2020YL	67.9	38.965	3.329	7.899
SD153	1BS	2020YL	59.7	42.947	3.534	7.686
SD154	1BS	2020YL	96.8	45.123	3.704	7.622
SD155	1BS	2020YL	65.7	41.19	3.462	7.409
SD156	1BS	2020YL	53.3	47.508	3.709	7.904
SD157	1BS	2020YL	76.66	43.647	3.547	7.064
SD158	1BS	2020YL	80.6	50.993	3.729	7.891
SD159	1BS	2020YL	100.5	45.133	3.651	7.329
SD160	1BS	2020YL	71.3	46.812	3.728	7.142
SD161	1BS	2020YL	68.4	48.101	3.781	7.577
SD162	1BS	2020YL	96.3	51.684	3.805	7.804
SD163	1RS	2020YL	80.2	51.717	3.825	7.592
SD164	1RS	2020YL	44.5	50.013	3.699	8.394
SD165	1BS	2020YL	83.4	37.807	3.33	6.836
SD166	1RS	2020YL	60.1	42.739	3.533	8.048
SD167	1BS	2020YL	75.9	43.896	3.493	7.576
SD168	1RS	2020YL	76.6	38.652	3.51	7.625
SD169	1BS	2020YL	96.2	47.505	3.548	7.604
SD170	1BS	2020YL	70.6	44.735	3.688	7.167
SD171	1BS	2020YL	46.6	31.573	3.276	6.93
SD172	1BS	2020YL	84.3	50.302	3.665	7.735
SD173	1RS	2020YL	56.8	44.091	3.479	8.139
SD174	1BS	2020YL	77.5	45.383	3.696	7.797
SD175	1BS	2020YL	86.2	53.075	3.853	7.447
SD176	1BS	2020YL	80	45.583	3.636	7.405
SD177	1RS	2020YL	65.6	41.214	3.377	7.139
SD178	1RS	2020YL	90.1	44.346	3.647	7.268
SD179	1BS	2020YL	83.8	41.288	3.56	6.99
SD180	1BS	2020YL	60.3	47.603	3.709	7.508
SD181	1BS	2020YL	72.6	45.935	3.611	7.457
SD182	1BS	2020YL	50	41.225	3.374	7.492
SD183	1RS	2020YL	81.5	46.597	3.739	7.269
SD184	1BS	2020YL	79.3	39.992	3.385	7.176
SD185	1BS	2020YL	97	43.203	3.578	6.934
SD186	1RS	2020YL	67	43.713	3.435	7.732
SD187	1BS	2020YL	71.1	43.973	3.611	7.67
SD188	1BS	2020YL	76	40.321	3.472	6.991
SD189	1BS	2020YL	58.3	46.776	3.732	6.949
SD190	1BS	2020YL	70.7	44.607	3.558	7.396
SD191	1BS	2020YL	57.1	47.353	3.595	8.149
SD192	1BS	2020YL	98.5	51.924	3.758	8.065
SD193	1RS	2020YL	75.9	44.227	3.393	7.593
SD194	1BS	2020YL	90.5	50.68	3.779	7.838
SD195	1BS	2020YL	74	45.46	3.695	7.172
SD196	1BS	2020YL	97	45.207	3.558	7.345
SD197	1BS	2020YL	70.6	44.06	3.594	8.143
SD198	1BS	2020YL	76.8	53.117	3.86	8.013
Xinong1376	1RS
Xiaoyan81	1BS

## Sheet: Sheet2
		Supplementary Table2 Sheet2 Two-factor analysis of variance between genotype and environment
		PH	Df	Sum Sq	Mean Sq	F value	Pr(>F)
		1B1R	1	1781	1781	9.18	0.00253	**
		Env	3	24991	8330	42.94	2e-16	***
		1B1R:Env	3	414	138	0.71	0.54588
		Residuals	784	152113	194
		TGW
		1B1R	1	13	12.9	0.595	0.441
		Env	3	3456	1151.9	53.286	<2e-16	***
		1B1R:Env	3	109	36.4	1.685	0.169
		Residuals	781	16883	21.6
		GW
		1B1R	1	0.038	0.0375	1.355	0.245
		Env	3	8.448	2.8161	101.761	<2e-16	***
		1B1R:Env	3	0.164	0.0548	1.981	0.115
		Residuals	781	21.613	0.0277
		GL
		1B1R	1	1.84	1.843	14.278	0.00017	***
		Env	3	22.07	7.358	57.014	2e-16	***
		1B1R:Env	3	0.1	0.032	0.248	0.86282
		Residuals	781	100.79	0.129
		Note：***represents a significant difference between the two factors at the level of 0.001.

## Sheet: Sheet3
	Supplementary Table2 Sheet3 Multiple comparison of Duncan's method
	Phenotype	Genotype	Mean	Groups	Environment	Mean	Groups
	PH	1BS	72.3809	a	2020NY	80.2778	a
	PH	1RS	68.9517	b	2020YL	72.442	b
	PH				2019NY	67.3252	c
	PH				2019YL	65.9454	c
	GL	1RS	7.40291	a	2020YL	7.5157	a
	GL	1BS	7.29236	b	2019YL	7.44394	b
	GL				2019NY	7.22814	c
	GL				2020NY	7.09731	d
	Note：Different letters represent significant differences at different 0.01 levels.
