# Supplementary material
Source: Preprints.org preprint supplement (doi:10.20944/preprints202104.0604.v1)
Supplement: Supplementary file 4 [file supplementary]

Archive with 11 entries (11 files):
- preprints-42060-supplementary/Supplementary Figure 1 The pedigree of Xinong 1376 and Xiaoyan 81.pdf
- preprints-42060-supplementary/Supplementary Figure 2 Correlation among plant height, TGW, grain length and grain width in different environments..pdf
- preprints-42060-supplementary/Supplementary Figure 2 x-sec-p1x-sec-p2 marker genotyping results..pdf
- preprints-42060-supplementary/Supplementary Figure 3 Based on the 660K chip labeling, the SNP markers that differ between the two parents are detected.pdf
- preprints-42060-supplementary/Supplementary Figure 4 QTL mapping of plant height and TGW phenotypes at genome-wide level.pdf
- preprints-42060-supplementary/Supplementary Figure 5 KASP_AX-109316968 and KASP_AX-109333198 markers genotyping results..pdf
- preprints-42060-supplementary/Supplementary Table 1 Functional markers of plant height and 1000 grain weight.xlsx
- preprints-42060-supplementary/Supplementary Table 2.xlsx
- preprints-42060-supplementary/Supplementary Table 3.xlsx
- preprints-42060-supplementary/Supplementary Table 4 Quantitative trait loci for 1000 grain weight on chromosome 4B.xlsx
- preprints-42060-supplementary/Supplementary Table 5  KASP_AX-109316968 and KASP_AX-109333198 markers genotyping results..xlsx
