# Supplementary material
Source: Preprints.org preprint supplement (doi:10.20944/preprints202104.0604.v1)
Supplement: Supplementary file 4 [file supplementary › preprints-42060-supplementary/Supplementary Figure 1 The pedigree of Xinong 1376 and Xiaoyan 81.pdf]

78(6)9-2 X Xiaoyan6

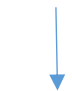

84G6 X B16

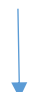

Xinong1376

? X Xiaoyan6

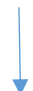

Xiaoyan54 X 8602

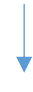

Xiaoyan81

**Supplementary Figure 1. The pedigree of Xinong 1376 and Xiaoyan 81**

**Note:**Xinong 1376 is a large-spike weak spring variety. Xiaoyan 81 is a multi-spike semi-winter variety.
