# Supplementary material
Source: Preprints.org preprint supplement (doi:10.20944/preprints202104.0604.v1)
Supplement: Supplementary file 4 [file supplementary › preprints-42060-supplementary/Supplementary Figure 2 x-sec-p1x-sec-p2 marker genotyping results..pdf]

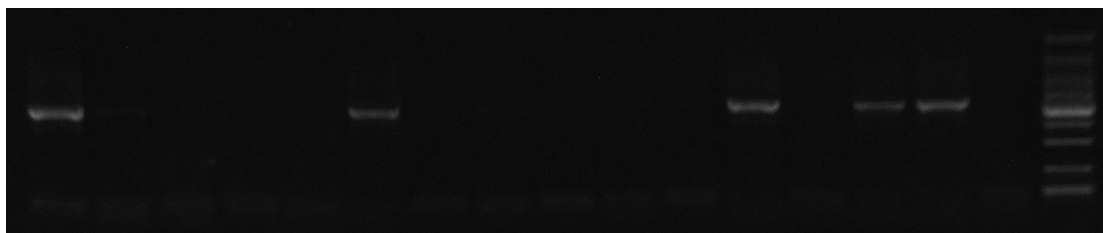

**Supplementary Figure 2. x-sec-p1/x-sec-p2 marker genotyping results.**

**Note:**From left to right: L76, L77, L79, L80, L81, L82, L83, L84, L85, L86, L87 L88, L89, L90, Xinong1376, Xiaoyan81.
