# Supplementary material
Source: Preprints.org preprint supplement (doi:10.20944/preprints202104.0604.v1)
Supplement: Supplementary file 4 [file supplementary › preprints-42060-supplementary/Supplementary Figure 3 Based on the 660K chip labeling, the SNP markers that differ between the two parents are detected.pdf]

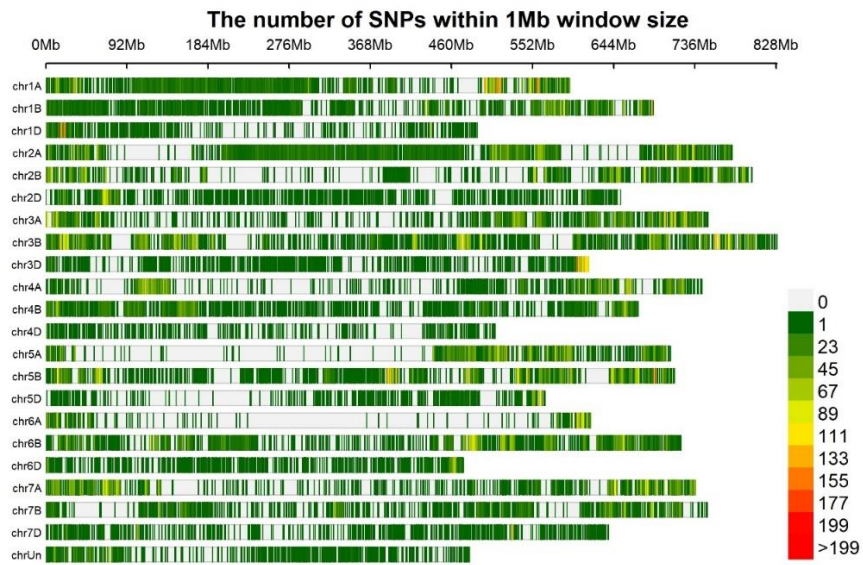

Supplementary Figure 3 Based on the 660K chip labeling, the SNP markers that differ between the two parents are detected.

Note: The largest gap appears on chromosomes 5A and 6A, the gaps are 65.17015MB and 135.1196MB, respectively.
