# Supplementary material
Source: Preprints.org preprint supplement (doi:10.20944/preprints202104.0604.v1)
Supplement: Supplementary file 4 [file supplementary › preprints-42060-supplementary/Supplementary Table 4 Quantitative trait loci for 1000 grain weight on chromosome 4B.xlsx]

## Sheet: Sheet1
Quantitative trait loci for 1000 grain weight on chromosome 4B
Method	Leaf Marker	Right Marker	Env	Num	Left location	Right location	Ref.
CIM	Tdurum_contig10967_269	Kukri_c8386_767	5	4	7.03137	8.7377	(Kumar et al. 2016)
CIM	Xwmc617	Xwmc710	7	4	15.7697	22.2598	(Ramya et al. 2010)
CIM	BS00011510_51	IWB6422	10	7	16.0567	21.0567	(Guan et al. 2018)
ICIM	IWA4662	IWA482	4	3	22.855	31.709	(Li et al. 2016)
SIM	Tdurum_contig81905_502	-	3	2	28.5429	/	(Russo et al. 2014)
CIM	BS00084904_51	BS00011338_51	10	6	28.9545	66.8118	(Guan et al. 2018)
CIM	Rht-B1	Xmag2055	10	5	30.8608	20.7415	(Cui et al. 2016)
CIM	Rht-B1	gwm165.1	3	3	30.8608	269.949	(Quarrie et al. 2005)
CIM	IWA482	IWA1846	4	1	31.709	38.0259	(Li et al. 2016)
ICIM	IWB12856	-	10	6	46.6212	/	(Li et al. 2018)
ICIM	Xbarc20	Xwmc238	3	3	75.7363	236.743	(Wang et al. 2010)
SIM/CIM	BARC20	WMC349	2	2	75.7363	640.977	(Gegas et al. 2010)
CIM	BARC20	CAU603	9	3	75.7363	125.838	(Liu et al. 2014)
ICIM	BS00105308_51	Tdurum_contig5562_441	4	4	139.755	392.043	(Cabral et al. 2018)’
CIM	barc20	wmc238	6	3	159.24	236.743	(Wang et al. 2011)
CIM	Xbarc199	Xmag2055	10	4	178.374	20.7412	(Cui et al. 2016)
CIM	Kukri_c61940_259	barc199	10	3	178.374	338.427	(Guan et al. 2018)
CIM	Excalibur_rep_c68588_1196	Ex_c101685_711	2	2	213.78	21.378	(Kumar et al. 2016)
SIM/CIM	wmc238	gwm495	3	3	359.782	482.82	(Jia et al. 2013)
CIM	BobWhite_c20051_53	-	10	4	449.125	66.8118	(Guan et al. 2018)
CIM	Xgwm495	wmc657	4	2	482.82	513.449	(Liao et al. 2008)
MLM/GLM	Xgwm107	-	1	1	499.137	/	(Mir et al. 2012)
SIM/CIM	GWM149	s13/m23.6	2	2	544.65	/	(Gegas et al. 2010)
MLM/GLM	Kukri_rep_c104941_336	-	8	1	559.855	/	(Zanke et al. 2015)
CIM	cfd39b	-	1	1	610.563	/	(Huang et al. 2006)
ICIM	Xwmc413	Xcfd39.2	5	1	641.542	481.549	(Han et al. 2016)
MLM/GLM	IWB4448	-	1	1	657.173	/	(Giacomo et al. 2018)
CIM	CAU603	BARC1174	9	2	/	452.782	(Li et al. 2016)
Reference
Cabral AL, Jordan MC, Larson G, Somers DJ, Humphreys DG, McCartney CA (2018) Relationship between QTL for grain shape, grain weight, test weight, milling yield, and plant height in the spring wheat cross RL4452/'AC Domain'. PLoS One 13 (1):e0190681. doi:10.1371/journal.pone.0190681
Cui F, Fan X, Chen M, Zhang N, Zhao C, Zhang W, Han J, Ji J, Zhao X, Yang L, Zhao Z, Tong Y, Wang T, Li J (2016) QTL detection for wheat kernel size and quality and the responses of these traits to low nitrogen stress. Theor Appl Genet 129 (3):469-484. doi:10.1007/s00122-015-2641-7
Gegas VC, Nazari A, Griffiths S, Simmonds J, Fish L, Orford S, Sayers L, Doonan JH, Snape JW (2010) A genetic framework for grain size and shape variation in wheat. Plant Cell 22 (4):1046-1056. doi:10.1105/tpc.110.074153
Giacomo M, Agata G, Pasqualina C, Ilaria M, Signorile AM, Rosanna S, Pasquale DV, Mastrangelo AM, Giovanni L, Nicola P (2018) Genetic dissection of the relationships between grain yield components by genome-wide association mapping in a collection of tetraploid wheats. Plos One 13 (1):e0190162
Guan P, Lu L, Jia L, Kabir MR, Zhang J, Lan T, Zhao Y, Xin M, Hu Z, Yao Y, Ni Z, Sun Q, Peng H (2018) Global QTL Analysis Identifies Genomic Regions on Chromosomes 4A and 4B Harboring Stable Loci for Yield-Related Traits Across Different Environments in Wheat (Triticum aestivum L.). Front Plant Sci 9:529. doi:10.3389/fpls.2018.00529
Han Z, Chen J, Li R, Deng Z, Tian J (2016) Conditional QTL mapping of three yield components in common wheat (Triticum aestivum L.). The Crop Journal 4 (3):220-228
Huang XQ, Cloutier S, Lycar L, Radovanovic N, Humphreys DG, Noll JS, Somers DJ, Brown PD (2006) Molecular detection of QTLs for agronomic and quality traits in a doubled haploid population derived from two Canadian wheats (Triticum aestivum L.). Theor Appl Genet 113 (4):753-766. doi:10.1007/s00122-006-0346-7
Jia H, Wan H, Yang S, Zhang Z, Kong Z, Xue S, Zhang L, Ma Z (2013) Genetic dissection of yield-related traits in a recombinant inbred line population created using a key breeding parent in China's wheat breeding. Theor Appl Genet 126 (8):2123-2139. doi:10.1007/s00122-013-2123-8
Kumar A, Mantovani EE, Seetan R, Soltani A, Echeverry-Solarte M, Jain S, Simsek S, Doehlert D, Alamri MS, Elias EM, Kianian SF, Mergoum M (2016) Dissection of Genetic Factors underlying Wheat Kernel Shape and Size in an Elite x Nonadapted Cross using a High Density SNP Linkage Map. Plant Genome 9 (1). doi:10.3835/plantgenome2015.09.0081
Li C, Bai G, Chao S, Carver B, Wang Z (2016) Single nucleotide polymorphisms linked to quantitative trait loci for grain quality traits in wheat. The Crop Journal 4 (1):1-11. doi:10.1016/j.cj.2015.10.002
Li F, Wen W, He Z, Liu J, Jin H, Cao S, Geng H, Yan J, Zhang P, Wan Y, Xia X (2018) Genome-wide linkage mapping of yield-related traits in three Chinese bread wheat populations using high-density SNP markers. Theor Appl Genet 131 (9):1903-1924. doi:10.1007/s00122-018-3122-6
Liao XZ, Wang J, Zhou RH, Ren ZL, Jia JZ (2008) Mining Favorable Alleles of QTLs Conferring Thousand-Grain Weight from Synthetic Wheat. Acta Agronomica Sinica 34 (11):1877-1884
Liu G, Jia L, Lu L, Qin D, Zhang J, Guan P, Ni Z, Yao Y, Sun Q, Peng H (2014) Mapping QTLs of yield-related traits using RIL population derived from common wheat and Tibetan semi-wild wheat. Theor Appl Genet 127 (11):2415-2432. doi:10.1007/s00122-014-2387-7
Mir RR, Kumar N, Jaiswal V, Girdharwal N, Prasad M, Balyan HS, Gupta PK (2012) Genetic dissection of grain weight in bread wheat through quantitative trait locus interval and association mapping. Molecular Breeding 29 (4):963-972. doi:10.1007/s11032-011-9693-4
Quarrie SA, Steed A, Calestani C, Semikhodskii A, Lebreton C, Chinoy C, Steele N, Pljevljakusic D, Waterman E, Weyen J, Schondelmaier J, Habash DZ, Farmer P, Saker L, Clarkson DT, Abugalieva A, Yessimbekova M, Turuspekov Y, Abugalieva S, Tuberosa R, Sanguineti MC, Hollington PA, Aragues R, Royo A, Dodig D (2005) A high-density genetic map of hexaploid wheat (Triticum aestivum L.) from the cross C…
Ramya P, Chaubal A, Kulkarni K, Gupta L, Kadoo N, Dhaliwal HS, Chhuneja P, Lagu M, Gupta V (2010) QTL mapping of 1000-kernel weight, kernel length, and kernel width in bread wheat (Triticum aestivum L.). J Appl Genet 51 (4):421-429. doi:10.1007/BF03208872
Russo MA, Ficco D, Laidò G, Marone D, Papa R, Blanco A, Gadaleta A, Vita PD, Mastrangelo AM (2014) A dense durum wheat × T. dicoccum linkage map based on SNP markers for the study of seed morphology. Molecular Breeding 34 (4):1579-1597
Wang J, Liu W, Hui W, Li L, Gao A (2011) QTL mapping of yield-related traits in the wheat germplasm 3228. Euphytica 177 (2):277-292
Wang J, Liu W, Wang H, Li L, Wu J, Yang X, Li X, Gao A (2010) QTL mapping of yield-related traits in the wheat germplasm 3228. Euphytica 177 (2):277-292. doi:10.1007/s10681-010-0267-z
Zanke CD, Ling J, Plieske J, Kollers S, Ebmeyer E, Korzun V, Argillier O, Stiewe G, Hinze M, Neumann F, Eichhorn A, Polley A, Jaenecke C, Ganal MW, Roder MS (2015) Analysis of main effect QTL for thousand grain weight in European winter wheat (Triticum aestivum L.) by genome-wide association mapping. Front Plant Sci 6:644. doi:10.3389/fpls.2015.00644
