# Supplementary material
Source: Preprints.org preprint supplement (doi:10.20944/preprints202104.0604.v1)
Supplement: Supplementary file 4 [file supplementary › preprints-42060-supplementary/Supplementary Table 5 KASP_AX-109316968 and KASP_AX-109333198 markers genotyping results..xlsx]

## Sheet: Primer sequences
Marker	A	B	common
AX-109316968_chr4B_25888344	GAAGGTGACCAAGTTCATGCTaggacagtttaatgctGCgA	GAAGGTCGGAGTCAACGGATTaggacagtttaatgctGCgG	cccagaaacatcttggcagA
AX-108931731_chr4B_25889648	GAAGGTGACCAAGTTCATGCTcgtctggttttatatcggccC	GAAGGTCGGAGTCAACGGATTcgtctggttttatatcggccT	cccaaactagctctaacccca

## Sheet: Marker genotyping
KASP_AX-109316968	B	A	A	A	B	A	A	B	B	B	A	A	A	A	A	A	B	B	A	A	A	A	B	A	B	A	A	B	B	A	H	A	B	A	B	B	B	A	A	B	A	B	B	A	A	B	B	A	A
KASP_AX-109333198	B	A	A	A	B	A	A	B	B	B	A	A	A	A	A	A	B	B	A	A	A	A	B	A	B	A	A	B	B	A	H	A	B	A	B	B	B	A	A	B	A	B	B	A	A	B	B	A	A
[truncated: 149 more columns]
